# Supplementary material for: The NDNF-like factor Nord is a Hedgehog-induced extracellular BMP modulator that regulates Drosophila wing patterning and growth
Source: PubMed Central journal article supplement (PMC8856659; doi:10.7554/elife.73357), 2022-01-17

# Figure 3-source data 1\_Uncropped western blot for Figure 3

3B

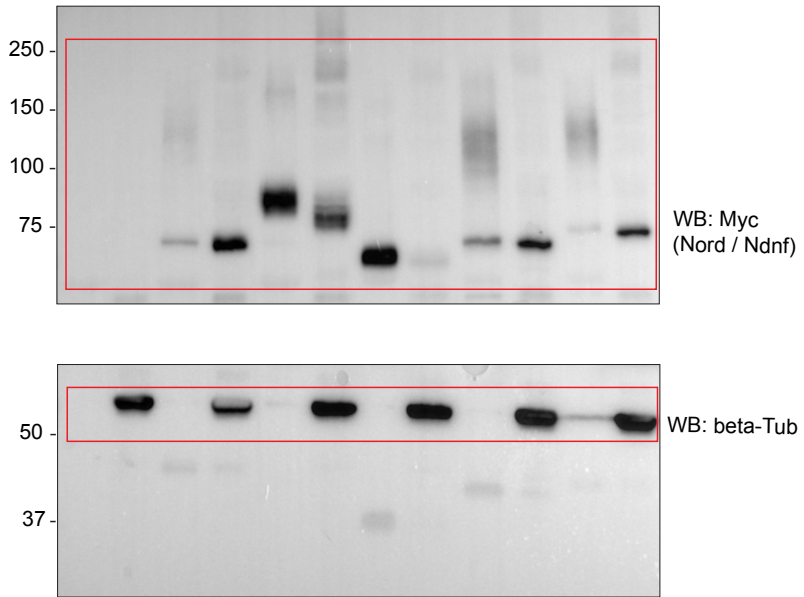

Supplement: elife-73357-fig3-data1.pdf [file elife-73357-fig3-data1.pdf]
