# Supplementary material for: The NDNF-like factor Nord is a Hedgehog-induced extracellular BMP modulator that regulates Drosophila wing patterning and growth
Source: PubMed Central journal article supplement (PMC8856659; doi:10.7554/elife.73357), 2022-01-17
Supplement: elife-73357-supp2.pdf [file elife-73357-supp2.pdf]

| Genotype                                          |             | Male (n) | Female (n) |
|---------------------------------------------------|-------------|----------|------------|
| <i>Mi{MIC}nord<sup>MI06414</sup>/Df(2R)BSC770</i> | Normal      | 81       | 72         |
|                                                   | Ectopic PCV | 0        | 0          |
| <i>Mi{MIC}nord<sup>MI06414</sup>/Df(2R)BSC356</i> | Normal      | 50       | 21         |
|                                                   | Ectopic PCV | 7        | 47         |
| <i>Mi{MIC}nord<sup>MI06414</sup>/Df(2R)BSC155</i> | Normal      | 46       | 19         |
|                                                   | Ectopic PCV | 12       | 81         |
| <i>Mi{MIC}nord<sup>MI06414</sup>/Df(2R)BSC780</i> | Normal      | 33       | 12         |
|                                                   | Ectopic PCV | 19       | 57         |
| <i>Mi{MIC}nord<sup>MI06414</sup>/Df(2R)BSC603</i> | Normal      | 67       | 68         |
|                                                   | Ectopic PCV | 0        | 0          |
| <i>Mi{MIC}nord<sup>MI06414</sup>/Df(2R)ED4061</i> | Normal      | 65       | 51         |
|                                                   | Ectopic PCV | 0        | 0          |

**Supplementary file 2. Quantification of the PCV phenotypes associated with *trans*-heterozygotic combinations of *Mi{MIC}nord<sup>MI06414</sup>* and tested deficiency lines**
