# Supplementary material for: The NDNF-like factor Nord is a Hedgehog-induced extracellular BMP modulator that regulates Drosophila wing patterning and growth
Source: eLife. 2022 Jan 17;11:e73357. doi: 10.7554/eLife.73357 (PMC8856659; doi:10.7554/eLife.73357)
Supplement: Supplementary file 1. — Genes (probe sets) whose expression is not only higher in A cells than P cells (FoldA/P > 1.2), but also higher in the A/P boundary adjacent B cells than general A cells (FoldB/P > 1.5) were selected as potential Hedgehog (Hh)-induced target genes. A total of 61 probe sets (59 unique genes) were identified as potential Hh signaling target genes. [file elife-73357-supp1.xlsx]

## Sheet: Figure 1B_ptc+ vs hh-
Probe ID	Gene Symbol	Fold Change (B/A) > 1.5	log2 Fold Change (B/A)
1637942_at	CG8538	1.5016	0.586501
1633983_a_at	CG42268	1.50167	0.586572
1624241_at	NaCP60E	1.50174	0.586634
1624123_at	CG13196	1.50341	0.588239
1641361_a_at	Mkp3	1.50358	0.588406
1633205_at	DAT	1.50363	0.588449
1630919_at	pip	1.5037	0.588512
1624533_s_at	trx	1.50409	0.588889
1630335_s_at	CG7084	1.50435	0.589143
1622957_s_at	Drep-3	1.5049	0.589667
1634931_at	CG6340	1.50554	0.590282
1631359_s_at	Vha100-2	1.50581	0.590538
1624244_at	S6k	1.50632	0.591027
1635089_at	tun	1.50664	0.591331
1634712_s_at	CLIP-190	1.50716	0.591832
1623049_at	CG9731	1.50846	0.593072
1626087_at	stan	1.50973	0.594288
1624849_at	Prosap	1.51054	0.595061
1636205_at	CG42232	1.51119	0.59568
1637955_a_at	CG1827	1.51246	0.596901
1639605_at	CG33993 /// DwilCG33993	1.51275	0.597178
1624468_a_at	CG10026	1.51318	0.597586
1629473_at	cdi	1.51408	0.598444
1623094_at	Tsp42Ei	1.51467	0.599
1640758_at	CG32613	1.51591	0.600183
1634016_at	CG2781	1.51637	0.600618
1629064_at	ewg	1.51677	0.601001
1640774_a_at	Mob2	1.51684	0.601073
1639733_s_at	CG14275	1.51685	0.601082
1634020_at	mei-P26	1.51978	0.60386
1638127_s_at	Dlic	1.52024	0.604299
1623330_at	CG5568	1.52165	0.60564
1635007_at	Sulf1	1.52231	0.606265
1633129_at	CG7183	1.52298	0.6069
1633612_at	ps	1.52313	0.607043
1630094_at	l(1)G0269	1.52434	0.608186
1636091_at	fj	1.52472	0.608545
1631146_at	alph	1.5264	0.610131
1634287_at	CG13737	1.52659	0.610313
1631225_at	CG8317	1.52683	0.610539
1631568_a_at	sdt	1.52717	0.610859
1625272_at	CG31030	1.52729	0.61097
1633112_at	moody	1.52747	0.611146
1629972_at	CG8188	1.52761	0.611275
1631635_at	CG7294	1.52779	0.611446
1626908_at	CG8066	1.52803	0.611673
1640082_at	MYPT-75D	1.52809	0.611728
1635200_at	CG11261	1.52843	0.612046
1636781_at	CG2144	1.52845	0.612067
1638810_at	Faa	1.52935	0.61292
1638012_at	rt	1.52936	0.612929
1633613_at	CG2765 /// DsimCG2765	1.53017	0.613695
1640856_at	CG14755	1.53147	0.614921
1624321_at	Rac2	1.53223	0.615631
1639928_a_at	Zasp52	1.53391	0.617215
1635655_at	cv-2	1.534	0.617298
1624192_at	r-cup	1.53413	0.617422
1625967_s_at	ps	1.53473	0.617984
1634099_at	rdgB	1.53503	0.618268
1628187_s_at	CG9691	1.53505	0.618283
1634325_a_at	MESK2	1.53593	0.61911
1630213_at	Fip1	1.53651	0.61966
1628613_a_at	CG30492 /// CG30494	1.53695	0.62007
1633975_s_at	CG12214	1.53968	0.622632
1639527_at	Klp31E	1.54032	0.623234
1629674_s_at	CG10999	1.54063	0.62352
1634309_at	CG14322	1.54095	0.623823
1627653_at	l(1)G0469	1.54104	0.623902
1637322_at	pyd	1.54168	0.624508
1624332_s_at	CG4098 /// CR18217	1.54218	0.624972
1633855_s_at	lid	1.54244	0.625211
1632091_at	CG8192	1.54306	0.625792
1627835_a_at	Cda5	1.5436	0.6263
1628778_at	itp	1.54504	0.627645
1629312_at	Obp57e	1.54506	0.627666
1641540_a_at	CG7668	1.54633	0.628847
1627247_at	Oseg1	1.54697	0.629449
1627354_at	CG11779 /// CG5835 /// DanaCG11779 /// DbipCG11779 /// DmeiCG11779 /// DmmmCG11779 /// DmplCG11779 /// DninCG11779 /// DpbpCG11779 /// DpbpCG5835 /// DpspCG11779 /// DvarCG11779	1.54754	0.629979
1626676_at	plexB	1.54787	0.630286
1634713_at	CG5532	1.5484	0.63078
1634992_s_at	CG9821 /// DsimCG9821	1.54852	0.630894
1625625_at	ImpE1	1.54862	0.630982
1630255_at	CG31676	1.54867	0.631028
1629921_a_at	Su(H)	1.54891	0.631257
1636219_at	Ac13E	1.5492	0.631522
1638143_a_at	Pvr	1.5496	0.631899
1627191_a_at	ena	1.55077	0.63298
1625744_at	GstE6	1.55095	0.633148
1639130_a_at	kkv	1.55198	0.634114
1627816_a_at	CG32264	1.55226	0.634369
1635273_s_at	kek5	1.55367	0.635679
1630245_at	shu	1.55503	0.636942
1636374_at	CAH1	1.55516	0.637064
1623980_at	CG15905	1.55535	0.637242
1639318_at	Su(Tpl)	1.55545	0.637335
1640541_at	faf	1.55563	0.6375
1639414_at	Snoo	1.55678	0.638567
1631993_s_at	Ald	1.55772	0.639433
1631300_at	Cyp18a1	1.55812	0.639805
1636309_at	CG4089	1.56002	0.641565
1624036_at	Cht5	1.56018	0.641717
1634739_a_at	Pfk	1.56041	0.641922
1630318_at	MED7	1.56233	0.643703
1641578_at	argos	1.56253	0.643887
1625281_at	CG6191	1.56311	0.644421
1641091_at	CG3280	1.56439	0.645597
1641723_a_at	PGRP-LC	1.56473	0.645911
1635729_a_at	Ptp61F	1.56495	0.646116
1641265_at	tty	1.56718	0.648174
1632895_at	CG31146	1.56723	0.648215
1633632_at	CG32944	1.56732	0.648302
1633733_a_at	svr	1.57014	0.650892
1641349_at	rdgA	1.57057	0.651284
1636149_at	CG31705	1.57229	0.652865
1631822_at	mus205	1.57249	0.653049
1637772_at	CG4726	1.57345	0.653936
1635124_at	ase	1.57353	0.654003
1639525_at	king-tubby	1.57357	0.654037
1629788_at	Kdm4B	1.57374	0.654196
1635389_s_at	Idgf4	1.57405	0.654481
1632975_at	CG4398	1.57459	0.654974
1641423_at	CG6739	1.57485	0.655218
1634398_a_at	Dl	1.576	0.656269
1623462_at	cato	1.57645	0.656681
1638244_s_at	CG8177 /// DmirCG8177	1.57802	0.658114
1625965_a_at	Osi2	1.5784	0.658465
1625051_at	4EHP /// Syx1A	1.58239	0.662103
1625570_at	Cpr64Ac	1.58457	0.664089
1634568_at	Cpr67Fa2	1.58555	0.664981
1631979_at	MICAL-like	1.58854	0.667704
1632294_at	sens	1.58862	0.667775
1630169_a_at	Sap47	1.5899	0.668934
1623949_s_at	CG32816	1.591	0.669933
1625385_at	ct	1.59213	0.670954
1625075_at	Nep2	1.59261	0.67139
1631371_s_at	Pde8	1.59276	0.671529
1634125_at	CG30440	1.59315	0.671879
1638616_at	mthl9	1.59413	0.672769
1626332_s_at	CG11486	1.59419	0.672828
1628194_at	CG2918	1.59464	0.673234
1628358_at	Tob	1.59538	0.673896
1625035_at	insc	1.59626	0.674699
1641068_a_at	spz	1.59663	0.675027
1627735_at	CG13908 /// DmirCG13908	1.59675	0.675141
1625183_at	smi35A	1.5974	0.675725
1636907_at	CG32982	1.59794	0.676211
1624720_s_at	CG6043	1.59979	0.677885
1639842_at	CG14314	1.60035	0.678384
1628884_at	PGRP-SA	1.60053	0.678553
1625646_at	CG11148	1.60087	0.67886
1628469_a_at	CG32529	1.60113	0.679088
1640439_at	CG11360	1.60204	0.67991
1625972_at	CG31999	1.60403	0.681701
1639637_a_at	CG3376	1.60472	0.682322
1638295_s_at	CG1129	1.60539	0.682923
1623244_at	Ect4	1.60566	0.683166
1626166_at	CG13082	1.60817	0.685419
1624763_at	CG2556	1.60839	0.68562
1630981_at	CG2698	1.61003	0.687092
1632119_s_at	ltd	1.61131	0.688236
1635340_at	tud	1.61235	0.689162
1635771_a_at	CG32306	1.613	0.689749
1626021_at	CG32055	1.61335	0.690059
1639677_at	ppa	1.61434	0.690948
1635138_at	Fur1	1.61442	0.691016
1637752_a_at	CG9363	1.61718	0.693477
1632582_at	CG9270	1.61727	0.69356
1625432_at	ths	1.61762	0.693875
1626235_at	m	1.61764	0.693894
1634619_at	IP3K1	1.61765	0.693901
1639532_at	CG5391	1.61773	0.693967
1623490_at	Ten-m	1.62074	0.696657
1628903_s_at	Sin3A	1.62091	0.696807
1623396_at	CG13875	1.62206	0.69783
1637438_at	Wnt2	1.62271	0.698407
1633713_at	CG33260 /// Trl	1.62382	0.699395
1635651_at	CG30195	1.6241	0.699636
1635951_at	CG7069	1.62557	0.700945
1635376_at	CG9086 /// DmirCG9086	1.62686	0.70209
1628453_at	l(1)G0289	1.62738	0.702555
1633016_a_at	stau	1.63097	0.705733
1627506_at	ed	1.63282	0.707365
1625890_at	CG14479	1.63453	0.708877
1631280_at	CG9095	1.63791	0.711853
1625974_at	ird5	1.63942	0.713189
1640309_s_at	Taf4	1.64051	0.714149
1639381_at	Cyp6a19	1.64066	0.714274
1635263_at	CG11825	1.64077	0.714373
1629479_a_at	fok	1.64304	0.716364
1634822_a_at	CG10344	1.6447	0.717827
1635227_at	ImpL3	1.64704	0.719879
1637478_s_at	heph	1.64839	0.721058
1636527_at	por	1.6495	0.722027
1624165_a_at	Psn	1.65024	0.72268
1630860_at	scrt	1.65075	0.723119
1631321_s_at	His1:CG31617 /// His1:CG33801 /// His1:CG33804 /// His1:CG33807 /// His1:CG33810 /// His1:CG33813 /// His1:CG33816 /// His1:CG33819 /// His1:CG33822 /// His1:CG33825 /// His1:CG33828 /// His1:CG33831 /// His1:CG33834 /// His1:CG33837 /// His1:CG33840 /// His1:CG33843 /// His1:CG33846 /// His1:CG33849 /// His1:CG33852 /// His1:CG33855 /// His1:CG33858 /// His1:CG33861 /// His1:CG33864	1.6531	0.725171
1640105_a_at	CG8726	1.65453	0.726423
1637189_at	CG7146	1.65511	0.726923
1626518_at	seq	1.65751	0.729021
1624374_at	CG12481	1.65885	0.730186
1625173_s_at	CG11652	1.65908	0.730387
1634092_at	Jarid2	1.65982	0.731031
1639640_at	CG32485	1.66275	0.733573
1625263_at	Nipped-A	1.66347	0.734192
1627472_at	AnnX	1.66434	0.734954
1628985_a_at	Caki	1.66532	0.735799
1635096_at	lola	1.66681	0.737088
1639917_at	CG32541 /// DsimCG32541	1.66688	0.737147
1626899_at	GATAd	1.66765	0.737819
1630067_a_at	TepII	1.66974	0.739626
1639940_at	disco	1.66999	0.739837
1628842_s_at	cals	1.67033	0.74013
1636750_s_at	CG13737	1.67159	0.74122
1633723_at	mav	1.67224	0.741784
1641149_at	CG11042	1.67447	0.743705
1630990_at	bs	1.67747	0.746285
1641048_a_at	toc	1.67784	0.746609
1626287_at	GV1	1.67938	0.747933
1631142_a_at	Caps	1.68111	0.749416
1622970_at	form3	1.68171	0.74993
1631794_at	CG6201	1.6833	0.751289
1632752_at	Ast	1.68346	0.751433
1635677_a_at	sty	1.68381	0.75173
1639447_at	CG15561	1.68382	0.751735
1629696_a_at	CG30497	1.68654	0.75407
1627998_s_at	CG2225	1.68714	0.754583
1625386_at	da	1.68813	0.755427
1624839_at	h	1.68862	0.755844
1635580_at	Cbl	1.68863	0.755852
1628201_at	CG4061	1.68874	0.755944
1640845_at	CG10581	1.68881	0.756008
1638189_s_at	S	1.68882	0.756017
1632782_a_at	CG7675	1.68895	0.756129
1627979_at	Wnt6	1.69044	0.757399
1634147_a_at	homer	1.69337	0.759894
1634265_at	Acp95EF	1.69454	0.760896
1629141_at	InR	1.69546	0.761673
1626120_at	CG42238 /// CG9266	1.69834	0.764123
1623084_at	sgg	1.70005	0.765574
1625405_at	yellow-c	1.7016	0.766888
1624001_at	sbb	1.70364	0.768622
1627320_at	zfh2	1.70366	0.76864
1626805_s_at	gish	1.70681	0.771306
1630361_at	nkd	1.7076	0.77197
1641400_at	CG9170	1.70889	0.773057
1628767_s_at	MED26	1.71205	0.775728
1630942_at	CG5742	1.7134	0.776863
1635848_at	Inos	1.71402	0.777386
1629469_s_at	CG10960	1.71451	0.777797
1637869_at	rdo	1.71506	0.778263
1640771_a_at	CG13627	1.7153	0.778462
1632448_s_at	kel	1.71553	0.778658
1629619_at	Aats-trp /// sage	1.7163	0.779305
1635980_s_at	CG12991	1.71788	0.780626
1624798_s_at	Galpha49B	1.71917	0.781711
1623932_at	Ent3	1.72099	0.783243
1629644_s_at	Mtl	1.72145	0.783623
1632830_s_at	G-oalpha47A	1.72425	0.785973
1633400_at	cue	1.7243	0.786008
1636998_at	sca	1.72546	0.786983
1625230_a_at	CG42389	1.72904	0.789972
1624300_s_at	nmo	1.73044	0.79114
1632352_a_at	CG30007	1.732	0.792443
1631400_at	Cpr66D	1.73238	0.792756
1635086_at	CG4666	1.7363	0.796018
1637110_at	CG3618	1.73776	0.797227
1628759_a_at	CG14073	1.7397	0.798842
1625964_at	rec	1.7403	0.79934
1631120_at	mbl	1.74153	0.800359
1628421_at	lola	1.74346	0.801957
1625862_x_at	CG40178 /// CG41320	1.74562	0.803738
1624262_at	phyl	1.74634	0.804335
1624699_s_at	Bx	1.74646	0.804437
1630964_at	CG15211	1.74764	0.805408
1625535_at	H15	1.74981	0.807202
1628475_at	CG8678	1.75157	0.808645
1632222_a_at	CG9238	1.75338	0.810136
1630913_at	Shroom	1.75441	0.810982
1637755_at	CG10987	1.75603	0.812315
1640431_at	Irbp	1.75657	0.812763
1641428_at	Cyp9c1	1.75659	0.812776
1631059_at	Pkc98E	1.7582	0.814098
1638442_at	Cad86C	1.7583	0.814184
1637867_at	mid	1.75953	0.815194
1639149_at	CG15313	1.76107	0.816452
1630831_at	CG7695	1.76315	0.818154
1632244_s_at	spz2	1.77371	0.826773
1624928_at	TORC	1.77406	0.827051
1634794_at	CG10924	1.77506	0.827867
1636248_at	CG15628	1.77596	0.828596
1633801_s_at	CG9171	1.77609	0.828709
1625139_at	Gadd45	1.77629	0.828867
1627761_at	fat2	1.77739	0.829759
1632191_s_at	hts	1.77803	0.83028
1633488_at	aay	1.77837	0.830553
1633807_at	l(3)neo38	1.7822	0.833658
1625636_s_at	pan	1.78271	0.834068
1633303_at	Cht6	1.78324	0.834501
1631430_at	Cdc27	1.78529	0.836161
1625638_a_at	Hex-A	1.78572	0.83651
1640256_at	bel	1.78579	0.836563
1636059_at	CG9689	1.78977	0.839772
1623372_at	CG5873	1.79216	0.8417
1633534_s_at	mura	1.79409	0.843249
1627681_at	Cpr35B	1.79731	0.84584
1625465_a_at	CG6028	1.79794	0.846343
1630717_s_at	cg	1.79813	0.846496
1632432_at	CG9850	1.79894	0.847149
1636458_at	CG4702	1.80026	0.848203
1623778_at	CG9162	1.80055	0.848438
1631281_a_at	amd	1.80262	0.850093
1638749_at	mamo	1.80302	0.850419
1634488_s_at	CG33111	1.8045	0.851599
1637552_s_at	shep	1.80487	0.851894
1623087_at	Gef64C	1.80552	0.852418
1624434_at	tld	1.80769	0.854151
1623256_at	GstE1	1.80992	0.855927
1637838_at	CG34380	1.81519	0.860121
1636941_at	CG9007 /// DmirCG9007	1.81695	0.861519
1623743_at	CG3191	1.81851	0.862756
1636304_at	egg	1.81972	0.863716
1632587_s_at	CG9130 /// CG9133	1.82437	0.867396
1627073_a_at	CG10126	1.82531	0.868141
1636805_a_at	CG8944	1.82534	0.868168
1625471_s_at	CG4928 /// DsimCG4928	1.82628	0.868909
1633795_a_at	CG17124	1.82754	0.869907
1631905_a_at	pyd	1.82843	0.870607
1635083_at	CG32458	1.83365	0.87472
1638639_a_at	CG18854 /// how	1.8346	0.875468
1641320_s_at	CG3168	1.83461	0.875472
1638476_s_at	mnb	1.8356	0.876249
1633471_at	Prx2540-2	1.83574	0.876362
1630635_s_at	CG7720	1.83647	0.876938
1636800_at	Orct2	1.83988	0.879611
1630119_s_at	norpA	1.84136	0.880775
1638325_at	Hn	1.84229	0.881503
1637534_at	olf186-F	1.84375	0.882645
1627275_at	CG9902	1.84517	0.883754
1627571_at	CrebA	1.84804	0.885993
1623536_s_at	CG11347	1.85334	0.890128
1641062_at	Ady43A	1.85686	0.892864
1623565_at	CG17278	1.86172	0.896635
1632868_a_at	wg	1.86295	0.897591
1632790_at	dream	1.86377	0.898227
1626842_a_at	l(3)82Fd	1.86446	0.898755
1641330_at	CG32212	1.86692	0.900661
1624885_at	CG32645	1.86943	0.902598
1625620_a_at	CG14425 /// Sxl	1.87085	0.903695
1628052_at	Cyp6a17	1.87146	0.904162
1634131_s_at	Mnt	1.88376	0.913616
1639004_at	tutl	1.88725	0.916285
1625559_a_at	CG30217	1.89199	0.919904
1636798_at	CG13482	1.89325	0.920864
1640736_at	b	1.8936	0.92113
1632132_at	CG5151	1.89437	0.92172
1628547_at	CG5167	1.89647	0.923318
1638376_at	Osi15	1.89742	0.924037
1626893_at	Gasp	1.89976	0.925814
1626867_at	His3:CG31613 /// His3:CG33803 /// His3:CG33806 /// His3:CG33809 /// His3:CG33812 /// His3:CG33815 /// His3:CG33818 /// His3:CG33821 /// His3:CG33824 /// His3:CG33827 /// His3:CG33830 /// His3:CG33833 /// His3:CG33836 /// His3:CG33839 /// His3:CG33842 /// His3:CG33845 /// His3:CG33848 /// His3:CG33851 /// His3:CG33854 /// His3:CG33857 /// His3:CG33860 /// His3:CG33863 /// His3:CG33866	1.90435	0.929296
1629740_at	His1:CG31617 /// His1:CG33801 /// His1:CG33804 /// His1:CG33807 /// His1:CG33810 /// His1:CG33813 /// His1:CG33816 /// His1:CG33819 /// His1:CG33822 /// His1:CG33825 /// His1:CG33828 /// His1:CG33831 /// His1:CG33834 /// His1:CG33837 /// His1:CG33840 /// His1:CG33843 /// His1:CG33846 /// His1:CG33849 /// His1:CG33852 /// His1:CG33855 /// His1:CG33858 /// His1:CG33861 /// His1:CG33864	1.90486	0.929682
1637746_at	CG18545	1.90568	0.930308
1623455_s_at	Imp	1.90573	0.930344
1631426_at	CG32412	1.90574	0.930351
1631534_at	sfl	1.90582	0.930413
1625249_at	fend	1.91146	0.934677
1640817_at	zormin	1.91289	0.935753
1633648_at	sns	1.91344	0.936167
1628503_at	CG30424	1.91652	0.938487
1632510_at	CG7332	1.91666	0.938596
1633349_at	TfIIFbeta	1.92088	0.94177
1641333_s_at	prominin-like	1.92144	0.942187
1628709_at	CG34265	1.92166	0.942352
1623682_a_at	Cam	1.92806	0.947153
1629368_at	slou	1.92826	0.947303
1635204_at	CG13568	1.92953	0.948248
1639483_s_at	Nep1	1.93008	0.948658
1624608_s_at	cpo	1.93036	0.948867
1639732_s_at	salr	1.93206	0.950139
1639551_at	bip2	1.93206	0.950143
1634809_s_at	CG30194	1.93445	0.951922
1622949_at	peb	1.93766	0.954317
1627511_at	chrb	1.93924	0.955492
1636864_at	corto	1.93979	0.955899
1640513_a_at	CG32150	1.9454	0.960064
1632117_s_at	Vha16	1.94571	0.960296
1640059_at	CG6040	1.9483	0.962218
1632644_s_at	cpo	1.94907	0.962788
1623753_at	TepIII	1.94925	0.962922
1623429_at	CG11073	1.95397	0.966412
1631628_s_at	CG12896 /// Prx2540-1 /// Prx2540-2	1.95606	0.967948
1629355_at	CG17374	1.9638	0.973646
1631038_at	CG32773	1.96496	0.974502
1628334_at	m4	1.96676	0.975819
1625511_at	CG34383	1.96682	0.975861
1638358_s_at	Bx	1.96998	0.978181
1632734_s_at	bnb	1.97108	0.978988
1626218_s_at	oaf	1.97212	0.979749
1630802_at	Cyp6d4	1.97311	0.980474
1631303_s_at	NK7.1	1.9788	0.984627
1641746_at	Cpr11B	1.98038	0.985781
1629515_at	Pdk	1.98247	0.987296
1634071_at	kek1	1.98442	0.988717
1629922_at	CG11409 /// DmirCG11409	1.98979	0.992619
1636954_at	NetB	1.99338	0.995218
1632524_at	Wnt4	1.99906	0.999321
1635445_at	sls	10.296	3.36401
1628671_a_at	sls	11.8603	3.56807
1636456_at	CG13053	11.8783	3.57026
1627608_s_at	CG32048	12.1679	3.60501
1632733_at	Hr4	12.6267	3.65841
1627445_s_at	en	13.8034	3.78695
1631203_at	CG6362	14.0746	3.81502
1630010_a_at	pnt	16.7835	4.06897
1641098_at	CG4382	17.282	4.1112
1631552_at	pyr	2.00006	1.00004
1624889_a_at	l(2)k16918	2.00024	1.00017
1623769_at	CG7322	2.00027	1.0002
1629733_at	Lim1	2.00034	1.00025
1628049_at	CG15828	2.00073	1.00053
1628085_at	CG15756	2.00711	1.00512
1635669_a_at	mirr	2.00998	1.00718
1637641_at	Mkp3	2.01142	1.00822
1633550_a_at	Ubx	2.01235	1.00888
1637359_at	Lsd-2	2.01443	1.01037
1628729_at	vvl	2.0152	1.01092
1632529_at	tinc	2.01774	1.01274
1632315_at	CG13035	2.01813	1.01302
1634468_at	CG13397	2.01929	1.01385
1624463_s_at	pr-set7	2.0199	1.01428
1627830_at	rpk	2.02255	1.01618
1637743_at	CG9461	2.02554	1.01831
1635264_s_at	lilli	2.03448	1.02466
1627101_at	scyl	2.03947	1.02819
1633386_s_at	mthl8	2.03972	1.02837
1633599_a_at	Pepck	2.05257	1.03743
1635125_a_at	CG6206 /// DsimCG6206	2.05526	1.03932
1631638_at	Pvf1	2.06321	1.04489
1623133_a_at	CG10508	2.06413	1.04553
1628952_s_at	Fur1	2.06753	1.04791
1629105_at	CG16735	2.06762	1.04797
1636312_at	CG12038	2.06879	1.04879
1639431_at	synaptogyrin	2.07142	1.05062
1633021_s_at	Spn	2.07398	1.0524
1640419_at	Abl	2.07808	1.05525
1640932_s_at	CG32626	2.08092	1.05722
1633556_s_at	Dad	2.08517	1.06017
1628859_at	shi	2.09007	1.06355
1637499_s_at	CG5953	2.0918	1.06475
1635276_at	CG11437	2.09201	1.06489
1629812_at	CG14915	2.09209	1.06494
1628893_at	CG15589	2.09436	1.06651
1623784_at	Gld2	2.09721	1.06847
1638308_s_at	His3:CG31613 /// His3:CG33803 /// His3:CG33806 /// His3:CG33809 /// His3:CG33812 /// His3:CG33815 /// His3:CG33818 /// His3:CG33821 /// His3:CG33824 /// His3:CG33827 /// His3:CG33830 /// His3:CG33833 /// His3:CG33836 /// His3:CG33839 /// His3:CG33842 /// His3:CG33845 /// His3:CG33848 /// His3:CG33851 /// His3:CG33854 /// His3:CG33857 /// His3:CG33860 /// His3:CG33863 /// His3:CG33866	2.10248	1.0721
1641476_a_at	Timp	2.10527	1.074
1628701_a_at	CG14798	2.10873	1.07637
1635728_a_at	ps	2.12154	1.08511
1627507_at	CG5704	2.13234	1.09244
1635037_at	CG4022	2.13901	1.09694
1632430_at	Tsf1	2.13982	1.09749
1631441_s_at	CG7447	2.14122	1.09843
1631053_at	Sgs7	2.15081	1.10488
1627270_at	CG42240	2.15374	1.10684
1632067_at	Ect4	2.15589	1.10828
1630820_at	CG17454	2.15868	1.11015
1633231_a_at	Trf2	2.16346	1.11334
1626232_at	Camta	2.1635	1.11337
1641114_at	mbl	2.16457	1.11408
1627136_at	Khc-73	2.16683	1.11558
1631055_at	Pka-C1	2.17228	1.11921
1632457_s_at	mam	2.17286	1.11959
1631597_at	foxo	2.17545	1.12131
1639306_s_at	hipk	2.17713	1.12243
1636595_a_at	CG13138	2.18638	1.12854
1624729_at	lola	2.18873	1.13009
1634146_at	CG42258	2.19836	1.13643
1628835_at	TwdlE	2.19837	1.13644
1628081_s_at	CG7530	2.20148	1.13847
1631218_at	Doc1	2.20174	1.13865
1627844_at	Cyp4e2	2.2059	1.14137
1635558_s_at	CG17724 /// seq	2.2068	1.14195
1634792_s_at	CG17838	2.20917	1.14351
1628797_at	CG17684	2.21238	1.1456
1636576_s_at	norpA	2.21291	1.14594
1626574_at	CG9935	2.21434	1.14688
1626639_a_at	Cad86C	2.21528	1.14749
1633833_at	CG18213	2.21936	1.15014
1629968_s_at	CG17370	2.21997	1.15054
1628757_at	Glut1	2.22075	1.15104
1635684_a_at	unc-13	2.22688	1.15503
1633888_s_at	kirre	2.2271	1.15516
1627614_at	chn	2.23015	1.15714
1635928_a_at	Pka-C3	2.23984	1.16339
1625621_s_at	f	2.25039	1.17017
1625072_s_at	Ac3	2.25242	1.17148
1624101_at	Cyp6a23	2.25412	1.17257
1636625_at	krimp	2.26006	1.17636
1623904_a_at	Rpt3R	2.26226	1.17777
1640754_at	bmm	2.26321	1.17837
1632231_a_at	Mhcl	2.26359	1.17862
1625642_at	CG11509	2.27868	1.1882
1626326_at	CG31436	2.28052	1.18936
1623102_at	Gip	2.28109	1.18972
1629362_at	mthl8	2.28268	1.19073
1631129_at	CG31612	2.29525	1.19865
1630883_at	CG33978	2.30315	1.20361
1632636_at	CG2145	2.31451	1.21071
1640614_at	cac	2.31866	1.21329
1631633_a_at	GNBP2	2.32516	1.21733
1638512_at	Sb	2.32663	1.21824
1639883_at	fz	2.33031	1.22052
1622908_a_at	CG10962	2.33666	1.22445
1638999_at	rno	2.34435	1.22919
1632177_at	hth	2.35015	1.23276
1623466_at	bab1	2.35046	1.23294
1641460_at	CanB	2.35086	1.23319
1639582_at	Pde11	2.35148	1.23357
1633262_s_at	Lim1	2.35382	1.235
1636925_at	CG31477	2.35627	1.23651
1631094_s_at	CG9339	2.35979	1.23866
1629318_at	CG17104	2.37111	1.24556
1630670_at	CG1368	2.3715	1.2458
1637905_s_at	CG2924	2.37753	1.24947
1623521_at	CG11909	2.39085	1.25752
1634507_s_at	CG17549	2.395	1.26002
1633123_at	CG7201	2.39654	1.26095
1631082_at	B52	2.40094	1.2636
1628865_at	opa	2.41284	1.27073
1633286_at	CG32372	2.42286	1.27671
1629095_a_at	Men	2.43375	1.28318
1639830_s_at	CG8850	2.44039	1.28711
1633334_at	CG15822	2.44262	1.28843
1626079_a_at	CG2201	2.45042	1.29303
1623693_a_at	drongo	2.46	1.29866
1640631_at	CG32809	2.46698	1.30275
1636679_at	Mrtf	2.48658	1.31417
1633849_at	CG31559	2.4894	1.3158
1640884_at	CG15784	2.48977	1.31601
1634364_s_at	stv	2.49218	1.31741
1622925_at	nej	2.49781	1.32066
1625719_at	Atpalpha	2.532	1.34027
1639749_a_at	ptc	2.54316	1.34662
1640280_at	lola	2.54814	1.34944
1634093_at	CG32017	2.55236	1.35183
1625877_s_at	CG41560 /// CG41584 /// CG42595	2.55663	1.35424
1640978_at	CG14567	2.55825	1.35516
1636733_at	CG32135	2.5601	1.3562
1636099_s_at	mbl	2.56202	1.35728
1635593_at	Cyp6d2	2.5628	1.35772
1633936_a_at	sca	2.57307	1.36349
1632541_at	Blimp-1	2.57367	1.36383
1632447_at	B52	2.58449	1.36988
1623171_s_at	lilli	2.59301	1.37463
1635452_a_at	CG42232	2.6037	1.38057
1628641_at	CG14470	2.60514	1.38136
1637135_at	CG15321 /// nej	2.60532	1.38146
1635766_at	Fs(2)Ket	2.61606	1.38739
1636268_at	CG10570	2.61634	1.38755
1625935_at	Trim9	2.62082	1.39002
1638037_a_at	dpr17	2.62539	1.39253
1626183_at	CG2083	2.62793	1.39393
1626338_s_at	vvl	2.63555	1.3981
1629926_at	CG1342	2.64245	1.40187
1635739_at	CG33960	2.64661	1.40415
1634520_at	vn	2.65752	1.41008
1628143_a_at	rg	2.66366	1.41341
1638984_s_at	CG17816	2.67652	1.42036
1635500_a_at	pros	2.68089	1.42271
1625416_x_at	grp	2.68486	1.42485
1640457_s_at	Bsg	2.68668	1.42583
1633905_at	RpL28	2.71177	1.43924
1628301_at	CG32159	2.71416	1.44051
1623659_at	Obp56d	2.7161	1.44154
1631804_s_at	PQBP-1	2.724	1.44573
1641338_at	fru	2.72803	1.44786
1638852_at	CHKov2	2.74629	1.45748
1641253_at	Src64B	2.74908	1.45895
1635730_at	CG30069	2.7569	1.46305
1635028_s_at	CG11714 /// Fuca	2.76552	1.46755
1633345_at	Scr	2.76838	1.46904
1639785_s_at	dpld /// wech	2.78207	1.47616
1628125_at	Doc2	2.78872	1.4796
1625872_at	CG34021	2.79531	1.48301
1629459_at	Doc3	2.80545	1.48823
1633059_at	CG6357	2.80764	1.48936
1638314_at	CG12418 /// CG34360	2.81333	1.49228
1624623_at	CG32972	2.81679	1.49405
1626392_s_at	Mef2	2.87455	1.52334
1632533_at	Timp	2.92072	1.54633
1633624_s_at	alphaTub84D	2.94064	1.55613
1626606_at	CG10630	2.94246	1.55702
1624851_at	Tango13	2.9432	1.55738
1628087_s_at	CG10200 /// DsimCG10200	2.95472	1.56302
1629880_at	grp	2.96128	1.56622
1631222_at	pdm3	2.9659	1.56847
1627160_at	CG34247	2.97846	1.57457
1635093_a_at	CG32369	2.98098	1.57579
1632870_at	CG32364	28.979	4.85694
1640760_at	CG17838	3.00054	1.58522
1629458_at	CG9411	3.01288	1.59114
1640321_at	CG1347	3.07792	1.62196
1631631_at	Cpr47Ee	3.07877	1.62236
1626984_at	Gld	3.11615	1.63976
1639469_a_at	Pu	3.13084	1.64655
1637936_at	CG32512	3.15069	1.65567
1626892_at	del	3.17564	1.66705
1640125_s_at	CG32541 /// DsimCG32541	3.18761	1.67247
1626058_at	lbl	3.20993	1.68254
1623612_at	CG7722 /// DsimCG7722	3.21824	1.68627
1641685_at	Edc3	3.22724	1.6903
1638533_at	l(3)neo38	3.28042	1.71388
1636035_at	beat-IIa	3.3014	1.72308
1631307_at	CG11438	3.30688	1.72547
1630007_s_at	Plc21C	3.31239	1.72787
1641364_at	CG8949	3.36618	1.75111
1623570_at	CG7924	3.37015	1.75281
1627135_at	bnl	3.37886	1.75654
1637602_at	Edem1	3.38588	1.75953
1637049_at	bi	3.39573	1.76372
1640235_at	W	3.46459	1.79268
1624450_at	Orct	3.47065	1.79521
1627881_at	salm	3.4779	1.79822
1625578_at	CG33097	3.5247	1.8175
1639545_a_at	Awh	3.54277	1.82488
1639874_at	Tim17a1	3.6148	1.85391
1626851_at	CG9460	3.65685	1.8706
1624663_a_at	vis	3.68157	1.88032
1632418_s_at	pum	3.74209	1.90384
1639838_at	CG8483	3.77327	1.91582
1637845_at	CG31230	3.77531	1.9166
1640363_a_at	CG6330	3.88346	1.95734
1638893_at	CG7029	3.92392	1.9723
1631632_s_at	BicC	3.94099	1.97856
1632910_at	CG7512	4.02008	2.00722
1626603_at	zormin	4.10766	2.03832
1633461_at	slik	4.13874	2.04919
1626527_at	hh	4.2201	2.07728
1626910_at	CG15282	4.27506	2.09594
1632898_at	CG33978	4.27888	2.09723
1636659_at	Cpr65Ec	4.39799	2.13685
1630163_at	CG32373	4.40282	2.13843
1630026_s_at	dpp	4.43981	2.1505
1640303_a_at	pst	4.45475	2.15534
1630621_at	CG15212	4.52769	2.17877
1626456_at	l(1)G0320	4.57612	2.19413
1636631_at	CG1139	4.62092	2.20818
1634833_at	PQBP-1	4.64439	2.21549
1636742_at	DmirCG13575 /// nord	5.15041	2.36469
1628121_at	Osi14	5.17276	2.37094
1634075_at	dp	5.35788	2.42166
1631701_a_at	Cpr49Ac	5.46262	2.44959
1626990_s_at	Mipp1	5.54278	2.47061
1622896_at	pinta	5.65909	2.50057
1623909_s_at	inv	5.67903	2.50564
1637432_at	CG3097	5.69355	2.50933
1630609_s_at	CG2225	5.75378	2.52451
1623291_at	CG31673	5.78135	2.53141
1638017_at	Cpr78E	5.90116	2.561
1631792_at	CG42330	5.97393	2.57868
1641538_at	CG30017	6.00444	2.58603
1625771_at	Dll	6.18046	2.62771
1634127_a_at	CG13029	6.39915	2.67788
1635367_at	fs(1)h	6.5998	2.72242
1634588_at	Sema-1a	7.0536	2.81836
1635462_at	rho	7.26817	2.86159
1624393_at	w	7.37743	2.88312
1623699_a_at	sm	7.4848	2.90396
1632860_at	Cpr64Aa	7.71839	2.9483
1639979_at	CG8927	8.07682	3.01379
1639479_a_at	kn	8.38775	3.06828
1638558_a_at	Snap25	8.90883	3.15524

## Sheet: Figure 1B_hh- vs hh+
Probe ID	Gene Symbol	Fold Change (A/P) > 1.2	log2 Fold Change (A/P)
1639388_a_at	CG12567	1.20001	0.263052
1640080_at	CG9253	1.20013	0.263191
1627390_at	CG2926	1.20013	0.263192
1638503_at	CG10969	1.20013	0.263192
1640928_at	CG7998	1.20016	0.263232
1625414_at	ifc	1.20026	0.263347
1633283_at	CG6764	1.20042	0.263535
1629125_at	gp210	1.20049	0.263626
1630254_at	CG2964	1.20051	0.263647
1625215_s_at	nrv2	1.2006	0.26376
1641378_at	phtf	1.20068	0.263855
1632389_at	CG14812	1.2007	0.263881
1632279_at	Rac1	1.20083	0.264031
1639195_a_at	CycA	1.20087	0.264079
1634013_at	mRpL17	1.20105	0.264298
1640289_a_at	CG40439	1.20111	0.264367
1630551_at	CG5290	1.20116	0.264434
1637788_at	CG31176	1.20121	0.264493
1630487_s_at	Hsp22 /// Hsp67Bb	1.20206	0.265506
1634172_at	TfIIB	1.20241	0.265924
1640947_at	CG15376	1.20242	0.265945
1626993_at	Sra-1	1.20244	0.26597
1634444_at	CG12736	1.20247	0.266001
1639749_a_at	ptc	1.20268	0.266253
1635805_at	CG3045	1.20291	0.266534
1630753_at	ric8a	1.20306	0.266708
1625849_at	REG	1.20312	0.266782
1627916_s_at	ras	1.2033	0.266991
1634955_at	mtacp1	1.20333	0.267037
1630763_at	CG6845	1.20385	0.267661
1638033_at	CG6055	1.20389	0.267706
1641608_at	CG5366	1.20392	0.267735
1640350_at	fau	1.20396	0.267783
1623858_at	NP15.6	1.20465	0.268617
1638164_at	CG4289	1.20477	0.268753
1630557_at	CG11859	1.20477	0.268763
1634944_at	l(2)tid	1.20493	0.268947
1624805_at	CG31041	1.20502	0.269062
1634584_at	CG31875	1.20513	0.269189
1627139_at	beta3GalTII	1.20516	0.26923
1625655_at	CG3214	1.20524	0.269319
1629568_at	CG33276	1.20526	0.26935
1640619_at	CG7028	1.20549	0.269616
1640770_a_at	Eip78C	1.20571	0.269879
1633563_at	CG1637	1.20602	0.270259
1637705_at	ewg	1.20611	0.270362
1635981_a_at	growl	1.20615	0.270412
1637717_at	sev	1.20648	0.27081
1634276_a_at	Adar	1.20674	0.271115
1628198_at	okr	1.20699	0.271415
1634709_at	CG12402	1.20708	0.271517
1634382_at	CG31675	1.20713	0.271584
1633089_a_at	lola	1.20714	0.271599
1640460_at	CG7275	1.20722	0.271693
1633888_s_at	kirre	1.20723	0.271705
1633751_at	CG10903	1.20734	0.271833
1628005_at	chinmo	1.20778	0.27236
1633274_at	CG10158	1.20809	0.27273
1626117_at	CG5720	1.20834	0.273025
1629554_at	spz4	1.20837	0.273067
1634427_at	CG15461	1.20839	0.273085
1633949_at	CG15152	1.20859	0.273323
1632810_at	CG7386	1.20861	0.273351
1635393_s_at	Eip75B	1.20867	0.273416
1632392_s_at	Slob	1.20872	0.273486
1639074_at	CG33275	1.20884	0.273621
1629705_at	CG6084	1.20886	0.273649
1624052_at	CG6294	1.20889	0.273683
1638350_at	CG6712	1.20949	0.274393
1640427_at	CG3215	1.20985	0.274833
1627014_a_at	CG6783	1.20994	0.274938
1639405_at	CG4857 /// DmirCG4857	1.21038	0.275465
1639836_at	Gr77a	1.21041	0.275492
1624559_a_at	Mlf	1.21048	0.275576
1637236_at	CG41284	1.2105	0.275601
1627667_at	CG16753	1.2105	0.275607
1628960_s_at	CG17829	1.21064	0.27577
1637141_at	CG4705	1.21076	0.275913
1623683_at	mRpL33	1.21085	0.276025
1632978_at	CG32207	1.21097	0.276167
1628587_at	CG8607	1.21124	0.276485
1624837_at	CG7506	1.21134	0.276607
1637460_at	CG30190	1.21139	0.276658
1630642_at	Pvf2	1.21161	0.276926
1629748_s_at	CG2747	1.21166	0.276986
1627107_at	CG12821	1.21172	0.277054
1639535_at	pgant2	1.21177	0.277115
1636073_at	CG32344	1.21186	0.277219
1626083_at	CG14137	1.21203	0.27742
1638044_a_at	CG5902	1.21223	0.277667
1629941_a_at	HP4	1.21247	0.277951
1631591_at	CG31935	1.21268	0.278203
1629639_at	CG14369	1.21272	0.278245
1633467_a_at	CG30459	1.2128	0.278345
1634530_at	CG13040	1.21307	0.278668
1624051_at	CG13850	1.21308	0.278674
1631264_at	CG2211	1.21317	0.278779
1634492_s_at	CG7597 /// DmirCG7597	1.21318	0.278796
1632026_at	EndoGI	1.2132	0.278822
1637752_a_at	CG9363	1.21331	0.27895
1625046_at	Rbm13	1.21333	0.278976
1633498_at	CG7188	1.21349	0.279165
1635256_s_at	CG1275	1.21353	0.279207
1639962_a_at	CoVa	1.21366	0.27936
1632406_at	CG9117	1.21371	0.27942
1627352_at	Oat	1.21377	0.279501
1633989_at	CG1124	1.21409	0.279873
1633611_s_at	CG32043	1.21433	0.280166
1636789_s_at	Tango11	1.2144	0.28024
1623564_at	Syx8	1.21464	0.280529
1631687_at	RN-tre	1.21524	0.281237
1639148_at	CG5325	1.21527	0.281273
1633935_at	skf	1.21576	0.281857
1634129_at	CG9663	1.2158	0.28191
1628957_at	l(2)35Bd	1.21587	0.281988
1633512_at	toy	1.21598	0.282118
1627059_at	und	1.21599	0.282131
1625437_at	CG32164 /// CG32165	1.21605	0.282202
1636003_at	CG6388	1.2161	0.282259
1639966_a_at	CG3262	1.21627	0.282464
1638020_at	CG10467	1.21629	0.282486
1630989_a_at	CG32442	1.21635	0.282557
1633980_at	CG14969	1.2167	0.28297
1633225_at	CG32278	1.21672	0.282997
1636371_at	CG2941	1.21676	0.283042
1633477_at	CG10496	1.21678	0.283072
1639139_a_at	Fps85D	1.21691	0.283227
1636596_at	CG10075	1.21717	0.283527
1627941_at	CG12984	1.21721	0.283579
1638697_at	CG5597	1.21731	0.283696
1622919_at	TwdlV	1.21737	0.28377
1624747_at	Ts	1.21743	0.28384
1623306_at	l(1)G0004	1.21746	0.283868
1628813_at	CG31381	1.21773	0.284192
1640120_at	CG40088	1.21778	0.284257
1640084_a_at	CG8712	1.21797	0.284481
1624746_at	betaTub85D	1.2182	0.284756
1638163_a_at	trr	1.21823	0.284792
1638203_at	CG7339	1.21875	0.285404
1624628_at	CG10396	1.21886	0.285533
1635363_a_at	CG1832 /// Jupiter	1.21888	0.285559
1629618_at	CG12256	1.2191	0.285811
1635246_at	Nrk	1.2191	0.285813
1630768_s_at	achi /// vis	1.21936	0.286128
1625154_s_at	pot	1.2195	0.286292
1635714_s_at	fdl	1.2195	0.286295
1634404_at	CG4573	1.21953	0.286324
1640265_a_at	Acph-1	1.21964	0.28645
1623353_at	abs	1.21965	0.286463
1624122_a_at	Rapgap1	1.21979	0.286638
1628301_at	CG32159	1.21999	0.286873
1640174_at	Int6	1.22016	0.287071
1634447_at	CG31140	1.2202	0.287121
1638121_at	CG9961	1.22025	0.28718
1634023_at	CG14544	1.22034	0.287285
1640744_a_at	CG6665	1.22043	0.287387
1629145_at	HERC2	1.22059	0.287573
1625128_a_at	CG2249 /// DsimCG2249	1.22065	0.287649
1624222_s_at	CG15814 /// DsimCG15814	1.22074	0.287753
1639587_s_at	CG7458	1.22079	0.28782
1628885_at	CG32698	1.22133	0.288451
1632721_at	Nle	1.22136	0.288489
1626263_at	CG7510	1.22142	0.288555
1625428_at	CG13707	1.22154	0.288697
1639623_at	CG34347	1.22159	0.288755
1631536_at	Dip3	1.22166	0.288842
1626653_a_at	ferrochelatase	1.22188	0.289098
1632700_a_at	CG18324	1.22199	0.289231
1631369_at	CG7567	1.22239	0.289702
1630529_at	CG11562	1.22239	0.289709
1636668_at	spz5	1.22254	0.28988
1641204_at	CG14864	1.22274	0.290115
1639984_at	raps	1.22274	0.290123
1634549_at	CG11750	1.22312	0.290565
1628101_s_at	CG32581 /// CG8974	1.22334	0.290829
1628274_a_at	CG31924	1.22353	0.291045
1626262_s_at	CG3104	1.22357	0.291099
1633791_at	KH1	1.22364	0.291181
1630686_at	CG2186	1.22387	0.291447
1636075_at	pch2	1.22396	0.291557
1626038_at	CG32174 /// frc	1.22401	0.291618
1632455_at	CG8680	1.22402	0.291632
1628987_at	CG5869	1.22409	0.291711
1626967_at	CalpB	1.22436	0.292032
1632818_at	CG32281	1.22458	0.292283
1625658_at	CG5181	1.22501	0.292789
1635976_at	CG9977	1.22501	0.292791
1635817_at	CG11131	1.22505	0.292838
1623374_a_at	Fim	1.2251	0.292904
1640454_at	CG17273	1.22522	0.293042
1636180_at	yip2	1.22533	0.293166
1639579_s_at	CG17257	1.22549	0.293362
1625659_at	Obp50d	1.22553	0.293408
1630354_at	CG42288	1.22561	0.2935
1627402_a_at	CG7630	1.22567	0.293574
1624982_s_at	CG5080	1.22588	0.293816
1638739_at	Cyp4ac3	1.22588	0.293821
1624256_at	CG16857	1.22591	0.293848
1627934_at	CG11723	1.22607	0.294044
1625120_at	CG14630 /// CG33082	1.22612	0.2941
1633229_a_at	Hr38	1.22629	0.294302
1636759_at	CG8303	1.22633	0.294347
1631937_at	CG31755	1.22647	0.294509
1630358_at	CG2162	1.22651	0.294564
1626972_at	CG11874	1.22657	0.294626
1628216_at	ppan	1.22665	0.294719
1634593_at	CG40228 /// DmojCG40228 /// DpseGA17880 /// DvirCG40228 /// DwilCG40228	1.22672	0.294808
1628338_at	CG32756	1.22685	0.294959
1640217_at	CG30154	1.22692	0.295044
1630252_at	RpS11	1.22702	0.295155
1630724_at	CG1890	1.22716	0.295327
1635538_at	CG11210	1.22741	0.295612
1636637_x_at	CG13731	1.22755	0.295777
1633821_at	B52	1.22762	0.29587
1627078_at	Oatp58Dc	1.22772	0.295976
1638864_at	Rab10	1.22809	0.296413
1634846_a_at	l(1)G0156	1.22812	0.296456
1628514_at	Ipk2	1.22816	0.296503
1632616_at	CG18094	1.22859	0.297001
1640992_at	CG2811	1.22863	0.297051
1626039_at	trem	1.22865	0.297079
1631311_at	CG14351	1.22871	0.297142
1633443_s_at	CG2082	1.22877	0.297211
1630313_a_at	CG15086	1.22884	0.297297
1633946_at	CG31955	1.22886	0.297316
1626195_at	CG12620	1.22913	0.29764
1640073_at	CG14164 /// CG6709	1.22917	0.297683
1630227_a_at	CG8165 /// CG8176	1.22924	0.297765
1629153_s_at	CG5991	1.22948	0.298054
1632199_at	corn	1.22975	0.298366
1636310_at	Victoria	1.22976	0.298372
1637955_a_at	CG1827	1.23003	0.298698
1628918_at	CG17478	1.23007	0.298735
1629696_a_at	CG30497	1.23036	0.299077
1624780_at	G9a	1.23041	0.299142
1632170_a_at	Cap-H2	1.23076	0.299548
1640671_at	CG34231	1.23084	0.299645
1635909_at	cic	1.23138	0.300273
1627032_a_at	CG8611	1.23149	0.30041
1636684_at	CG31126	1.23161	0.300546
1637628_at	CG6550	1.23162	0.300561
1629069_at	CG7504	1.23173	0.300683
1640590_at	CG32195	1.23177	0.300734
1638529_at	Scsalpha	1.23186	0.30084
1632494_at	Grip163	1.23201	0.301018
1631414_at	CG11313	1.23259	0.301688
1629262_at	CG30001	1.23264	0.30175
1634939_at	CG13077	1.23266	0.301779
1622907_at	CG30120 /// CG5189	1.23272	0.301849
1638702_a_at	achi	1.23277	0.3019
1625769_at	CG1113 /// DsecGM10796	1.23293	0.302093
1640145_at	bys	1.23405	0.303404
1623121_at	CG5521	1.23419	0.303565
1639034_at	CG7593	1.23446	0.303878
1625260_at	CG11802	1.23484	0.304323
1637602_at	Edem1	1.23486	0.304353
1633192_at	CG34406	1.23508	0.304601
1637060_a_at	Nopp140	1.23526	0.304809
1635482_at	CG2976	1.23531	0.304873
1623952_a_at	Su(z)12	1.23557	0.305178
1623685_at	CG4064	1.23565	0.305273
1633573_a_at	att-ORFA /// att-ORFB	1.23566	0.305276
1629593_at	CG10866	1.2357	0.305332
1632261_at	CG32732	1.23593	0.305599
1629181_at	CG33494	1.23596	0.305633
1624963_at	CG17802	1.2362	0.305911
1633003_at	CG30349	1.23623	0.305952
1629023_s_at	CG40191	1.23628	0.306008
1638185_at	CG14613	1.23674	0.306545
1626294_a_at	stai	1.2369	0.306728
1634053_at	CG8408	1.23714	0.307014
1639590_at	CG15134	1.23758	0.307525
1628362_s_at	CG2941 /// CG32783 /// CG32786	1.23805	0.308069
1634842_a_at	CG11160	1.23825	0.3083
1636921_at	l(2)06496	1.23841	0.308485
1631465_at	CG3919	1.23864	0.308755
1639923_at	CG30502	1.23888	0.309042
1638367_at	CG7686	1.2389	0.309055
1636387_at	CG10300	1.23917	0.309369
1641655_at	CG8993	1.23987	0.310193
1626370_at	CG31120	1.24032	0.310708
1636358_a_at	eIF-4B	1.2405	0.310916
1637554_a_at	Dp	1.24085	0.311332
1629082_at	CG14407	1.2409	0.311391
1628184_at	Tsp3A	1.24096	0.311454
1625354_at	alpha-Est3	1.24103	0.31154
1624283_at	Cpr47Eb	1.24124	0.311783
1623044_at	Cp15	1.24136	0.311927
1640962_s_at	CG4091	1.24138	0.311941
1633069_s_at	CG10277	1.24144	0.312013
1630602_at	CG13842	1.24144	0.312014
1637598_at	CG15715	1.24163	0.312239
1623924_at	CG12325	1.24178	0.312406
1626771_at	spri	1.24185	0.312491
1627312_at	RpL12	1.24219	0.312883
1640233_at	CG5174	1.24259	0.313347
1624907_at	Tsp42Ee	1.24278	0.313573
1635023_at	CG3560	1.24302	0.313853
1626089_at	CG32234	1.24321	0.31407
1632685_at	CG32603	1.24363	0.314555
1638453_at	CG9849	1.24374	0.314688
1635109_at	CG5888	1.24399	0.314973
1631724_s_at	CG17746	1.24436	0.315406
1633333_a_at	CG7231	1.24445	0.315509
1625542_a_at	Tm1	1.24451	0.315575
1637612_at	Hip14	1.24479	0.315904
1627214_s_at	CG7650	1.24504	0.316197
1627958_at	CG30269	1.24509	0.316246
1623954_s_at	CoRest	1.24519	0.31637
1632804_at	CG7175	1.24548	0.316698
1624489_a_at	CG11596	1.24549	0.316714
1637203_at	rev7	1.24557	0.31681
1636231_at	CG3781	1.24561	0.316847
1629229_a_at	srp	1.24597	0.317273
1638822_at	CG6859	1.24604	0.317348
1626494_at	DNApol-eta	1.24609	0.317413
1639042_at	CG6414	1.24613	0.31746
1638797_a_at	Hph	1.24623	0.317574
1641025_at	CG11134	1.24627	0.317612
1628142_at	CG12986	1.24643	0.317801
1637615_at	CG13192	1.24666	0.31807
1631028_s_at	l(2)k09913	1.24671	0.318131
1641631_at	CG4982 /// Idgf4	1.24675	0.318171
1631512_at	CG9377	1.24678	0.318203
1624650_at	CG33087	1.24687	0.318311
1638699_at	CG6470	1.24695	0.318408
1627087_at	CG14805	1.24702	0.31848
1631256_at	Upf2	1.24702	0.318486
1631273_at	CG5262	1.24783	0.319425
1625943_at	RpS30	1.24801	0.31963
1638807_s_at	CG4829	1.24868	0.320403
1630146_at	CG12508	1.24943	0.321269
1628481_at	mRpL1	1.24999	0.321917
1634950_at	CG12785	1.2501	0.322048
1624608_s_at	cpo	1.25024	0.322209
1639036_at	RpS11	1.2503	0.322278
1637284_at	Rlip	1.25039	0.322377
1637211_at	CG13045	1.25047	0.322475
1634687_at	CG15019	1.25048	0.322485
1633884_at	Rtf1	1.25117	0.323274
1626367_at	Sgt	1.2513	0.32343
1629601_at	malpha	1.25132	0.323452
1639514_at	CG4159	1.25153	0.32369
1634000_a_at	CG1847	1.25195	0.324178
1631223_at	CG2100	1.2524	0.324698
1624337_at	RpS14b	1.25257	0.324894
1635028_s_at	CG11714 /// Fuca	1.25288	0.325251
1636569_a_at	CG11883	1.25302	0.32541
1641318_at	CG8132	1.25331	0.325738
1629572_a_at	fat-spondin	1.25371	0.326201
1625844_s_at	apt	1.25425	0.32683
1638630_at	CG1983	1.25437	0.326958
1627327_at	dro5	1.25443	0.327034
1636942_at	CG8498	1.25445	0.327056
1637504_at	CG17754	1.25498	0.327667
1629865_s_at	ric8a	1.25504	0.327739
1623194_at	CG7637	1.25507	0.327769
1632003_a_at	Ptp99A	1.2553	0.328036
1627081_at	robl37BC	1.25534	0.328081
1638215_at	CG8043	1.25542	0.328174
1638329_at	png	1.25576	0.328556
1624623_at	CG32972	1.25584	0.328647
1639484_at	CG1635	1.256	0.328842
1637479_at	pn	1.2564	0.329293
1638986_s_at	CG11905	1.25642	0.329314
1626769_s_at	CG1553	1.25686	0.329828
1634621_at	CG13599	1.25708	0.330079
1634112_a_at	CG5174	1.25744	0.33049
1632728_at	Gcn2	1.25746	0.330516
1632438_at	CG2091	1.25748	0.330533
1626904_at	CG42233	1.25762	0.330696
1639894_at	KP78b	1.25804	0.331183
1636153_at	CG6984	1.25806	0.331204
1624931_at	cib	1.25818	0.331337
1637838_at	CG34380	1.2582	0.331359
1628315_at	CG17264	1.25865	0.331877
1630421_at	CG33170	1.2587	0.331939
1641168_s_at	CG1416	1.25872	0.331953
1637165_at	Cchl	1.25916	0.332465
1639245_x_at	mys	1.25933	0.332654
1624362_at	Nplp4	1.25982	0.333212
1628271_at	CG3609	1.25986	0.33326
1638005_s_at	smg	1.26015	0.333592
1627801_at	CG9497	1.26015	0.333596
1625145_a_at	Anxb11	1.26073	0.334262
1636695_at	Pk17E	1.2608	0.334335
1630617_at	kek2	1.26116	0.334747
1626724_at	CG32687	1.26118	0.334776
1625675_a_at	CG4853	1.26158	0.335228
1641554_at	DmirCG16728 /// Git	1.26185	0.335537
1640501_at	CG3829	1.26194	0.33564
1635715_at	His4:CG31611 /// His4:CG33869 /// His4:CG33871 /// His4:CG33873 /// His4:CG33875 /// His4:CG33877 /// His4:CG33879 /// His4:CG33881 /// His4:CG33883 /// His4:CG33885 /// His4:CG33887 /// His4:CG33889 /// His4:CG33891 /// His4:CG33893 /// His4:CG33895 /// His4:CG33897 /// His4:CG33899 /// His4:CG33901 /// His4:CG33903 /// His4:CG33905 /// His4:CG33907 /// His4:CG33909	1.26222	0.33596
1633474_x_at	CG32603	1.26234	0.336097
1631499_a_at	sws	1.26246	0.336232
1624132_at	CG4447	1.26248	0.336263
1635967_at	qm	1.26249	0.336271
1627071_at	dpr	1.26283	0.336657
1638844_s_at	CG3714	1.26283	0.336665
1623302_at	CG8067	1.26305	0.336914
1626785_at	Nap1	1.26323	0.337119
1637380_s_at	CaMKI	1.26342	0.337337
1635009_at	CG8500	1.26342	0.337337
1634509_s_at	fwd	1.26379	0.33776
1638468_at	CG30051	1.26389	0.337873
1634608_at	CG30383	1.26394	0.337927
1636037_at	CG31195	1.26397	0.337961
1632294_at	sens	1.26398	0.337971
1628483_at	CG3004	1.26446	0.338516
1639133_at	CG1939	1.26446	0.338516
1626347_at	CG15877	1.26485	0.338968
1634083_at	Nf1	1.2651	0.339255
1624952_at	Gr47b	1.2655	0.339706
1635310_s_at	CG31688	1.26582	0.340068
1624504_s_at	Mtch	1.26598	0.34025
1634414_at	mRpL23	1.26606	0.340351
1631519_at	CG9143	1.26608	0.340367
1638310_at	Hlc	1.26611	0.340399
1627206_at	RpL35	1.2662	0.340506
1624010_a_at	CG9062	1.2662	0.34051
1629424_at	CG42323	1.26623	0.34054
1626421_at	CG4662	1.26666	0.341034
1636242_at	Ilp6	1.26708	0.341506
1631344_at	msb1l	1.26723	0.341676
1630477_at	msl-3	1.26731	0.341773
1624078_at	CG5463	1.268	0.342552
1625963_at	CG1896	1.268	0.342553
1629288_s_at	CG12608 /// CG9123 /// DpseGA11717	1.26825	0.342837
1640960_at	CG2224	1.26828	0.342872
1628427_a_at	Rab40	1.26838	0.342983
1636990_at	botv	1.26838	0.342986
1639461_a_at	Itp-r83A	1.26854	0.343174
1639728_at	CG5916	1.26885	0.34352
1632074_at	luna	1.26892	0.343599
1628282_at	m-cup	1.26893	0.34361
1625862_x_at	CG40178 /// CG41320	1.26905	0.343748
1633606_s_at	CG33199 /// CG8229	1.26908	0.343786
1633094_a_at	toy	1.26911	0.343819
1632275_a_at	CG8671	1.26912	0.343829
1631126_at	gcm	1.26984	0.344651
1639562_at	CG12491 /// CG34105	1.26989	0.3447
1624210_at	CG32699	1.27071	0.34564
1633316_at	CG30490	1.27129	0.346298
1633110_at	CG3353	1.27164	0.346685
1624412_at	ap	1.27203	0.347137
1633958_at	SamDC	1.27203	0.347138
1637913_at	CG11638	1.27208	0.347184
1640547_at	mew	1.27217	0.347287
1627111_at	NHP2	1.27307	0.348308
1633681_at	CG2519	1.27337	0.348652
1627930_s_at	CG32280	1.27379	0.349127
1637571_at	CG11577	1.2739	0.349256
1624668_s_at	CG9422	1.27429	0.349697
1634840_at	CG32248	1.27441	0.349834
1631774_at	Cpr66Cb	1.27477	0.350233
1623664_at	CG10585	1.27506	0.350567
1625756_at	CG6656	1.27521	0.350735
1637142_at	CG9547	1.27568	0.351264
1633247_at	CG7006	1.27572	0.351311
1627551_s_at	AttA /// AttB	1.27588	0.351492
1641449_at	Dcr-2	1.2761	0.351739
1637806_at	Ada	1.27684	0.352577
1637977_a_at	Notum	1.27691	0.352656
1628567_at	CG13565	1.27704	0.352804
1640069_at	CG4866	1.27709	0.352862
1629823_at	CG4230	1.27718	0.352962
1628299_at	CG5339	1.27742	0.353232
1632923_at	CG14661	1.27757	0.353403
1638122_a_at	CG10874	1.27776	0.353621
1640681_at	CG4950	1.27779	0.353653
1639502_at	nimC1	1.27796	0.353847
1627257_at	CG4433	1.27888	0.354886
1635279_at	pont	1.27913	0.355161
1627822_at	CG2938	1.27918	0.355224
1637645_at	miple2	1.27939	0.355452
1630212_at	CG2065	1.27954	0.355623
1640773_at	tow	1.27959	0.355684
1635020_s_at	phr6-4	1.27988	0.356008
1624205_at	Tom40	1.28027	0.356446
1633409_a_at	CG10598	1.28044	0.356638
1635027_at	CG31800	1.28067	0.356895
1630363_at	CG10469	1.2814	0.357718
1623508_at	CG30466	1.28154	0.357884
1633403_at	Socs44A	1.28168	0.358036
1639321_s_at	Tl	1.28183	0.35821
1630008_at	CG18428	1.282	0.358395
1629008_at	CG3817	1.28216	0.358572
1628731_s_at	CG13741 /// CG8080	1.28223	0.358652
1641199_a_at	CG1544	1.28224	0.358664
1627020_at	CG11110	1.28257	0.359038
1639482_a_at	CG32549	1.28269	0.359168
1628956_at	BCL7-like	1.28329	0.35985
1628907_at	T3dh	1.28341	0.359981
1628563_at	CG33181	1.28341	0.359984
1633329_at	yellow-h	1.28369	0.360295
1638173_s_at	CG2950	1.28374	0.360349
1634972_at	CG4802	1.28376	0.36037
1626817_at	Rrp45	1.2839	0.360529
1641084_at	CG13897	1.28501	0.361785
1640853_at	CG15020	1.28511	0.361897
1628583_at	CG31688	1.28529	0.362089
1635151_at	COQ7	1.28536	0.362175
1623867_at	CG14168	1.28566	0.362513
1635079_at	CG1550	1.28583	0.362697
1631149_s_at	La	1.28603	0.362929
1623861_at	Eip55E	1.28634	0.363275
1635978_at	CG8229	1.28641	0.363354
1637649_at	CG1707	1.2868	0.363792
1629687_s_at	CG15891 /// CG15892	1.28698	0.363989
1626588_a_at	CG5325	1.28729	0.364333
1623569_at	CG14906 /// CG14907	1.28778	0.364883
1627950_at	CG14237	1.28788	0.364993
1634649_at	mys	1.28816	0.365308
1623926_at	mbm	1.2885	0.36569
1634372_at	Ddr	1.28872	0.365937
1625297_at	CG8128 /// DmirCG8128	1.28899	0.366244
1635931_at	CG11563	1.28923	0.36651
1624150_at	FKBP59	1.28942	0.366728
1627462_a_at	CG4662	1.28945	0.366757
1640326_at	CG30381	1.28966	0.366987
1638475_a_at	CG16885	1.2898	0.367144
1632146_a_at	CG5508	1.29008	0.367459
1639654_at	CG3603	1.29041	0.367828
1623984_s_at	Mical	1.29064	0.368092
1630640_at	CG4594	1.29112	0.368621
1628080_at	GIIIspla2	1.29229	0.369931
1623688_at	CG3680	1.29235	0.370002
1640215_at	CG4338	1.29345	0.371226
1640424_at	CG14463	1.29352	0.371299
1634979_at	CG18600	1.29358	0.371374
1632285_at	CG42314	1.29379	0.371599
1634291_at	CG11814 /// DmirCG11814	1.29387	0.371693
1625317_at	CG3735	1.29487	0.37281
1637849_at	OdsH	1.29576	0.373803
1623932_at	Ent3	1.29589	0.373948
1629417_s_at	CG14853	1.29642	0.374531
1634454_at	Bruce	1.29646	0.374579
1627996_a_at	Pi4KIIalpha	1.29652	0.374639
1637562_at	TwdlT	1.29661	0.374746
1624715_at	mtacp1	1.29684	0.375003
1635825_a_at	TFAM	1.29689	0.375056
1641502_a_at	CG9391	1.29764	0.375886
1630854_at	CG32193	1.29776	0.376028
1627280_s_at	pnut	1.29793	0.376215
1629942_at	CG5292	1.2981	0.376397
1630781_at	fs(2)ltoPP43	1.2981	0.376403
1633654_s_at	IP3K2	1.29909	0.377503
1624842_at	koi	1.29937	0.377809
1636314_at	mtSSB	1.29941	0.37786
1630921_at	bbg	1.2995	0.377956
1633305_at	Obp99a	1.29982	0.378314
1639774_at	CG15202	1.30011	0.378637
1626371_at	CG8507	1.30038	0.378933
1634342_s_at	CG15744	1.30105	0.379682
1631527_at	CG5642	1.30185	0.380558
1623591_a_at	CG17883	1.30221	0.380958
1626404_a_at	bsk	1.30251	0.381299
1630698_at	CG3192	1.3026	0.38139
1637635_at	CG4766 /// DmauCG4766 /// DsimCG4766	1.30293	0.381758
1624599_at	CG34331	1.30297	0.381808
1640104_at	RpS5b	1.30299	0.381827
1630453_at	CG32267	1.30347	0.382357
1641195_at	Prx5037	1.30442	0.383406
1638055_at	Cpr72Ea	1.30462	0.383629
1635794_a_at	CG12535	1.30481	0.38384
1627056_a_at	l(2)05714	1.30525	0.384323
1633822_at	CG7519	1.30589	0.385038
1639830_s_at	CG8850	1.30618	0.385354
1632972_at	Nep3	1.3062	0.385377
1623445_at	CG14095	1.30641	0.385609
1634001_at	CG9062	1.30651	0.385713
1631827_at	CG15863	1.30658	0.385793
1639471_s_at	muskelin	1.30678	0.386014
1626508_at	CG32428	1.30719	0.386464
1636728_at	Ptr	1.30742	0.386728
1637509_s_at	Tim10	1.30769	0.387021
1636101_a_at	CG31729	1.30792	0.387269
1625923_s_at	Flo-2	1.30858	0.388
1637472_at	TwdlY	1.30889	0.388347
1639117_a_at	CG33096	1.30903	0.388498
1627515_at	CG10641	1.30908	0.388553
1635570_a_at	CrebB-17A	1.30954	0.389065
1626158_s_at	nes	1.30975	0.38929
1638507_at	mRpL46	1.30981	0.389362
1634178_at	CG4351	1.31004	0.389609
1633131_s_at	CG32164 /// CG32165	1.31019	0.389775
1625287_at	CG40178 /// CG41320	1.31044	0.390051
1629209_at	CG9286	1.31061	0.390234
1641681_s_at	CG5288 /// DsecCG5288 /// DsimCG5288	1.31084	0.390488
1635070_at	CG9953	1.31145	0.39116
1624164_s_at	GlcAT-P	1.31149	0.39121
1633964_at	CG3626 /// DmirCG3626	1.31194	0.391697
1629382_at	fal	1.31238	0.392186
1627593_at	CG2678	1.31241	0.392215
1630951_at	CG18275	1.31253	0.392347
1624176_at	CG10590	1.31344	0.39335
1639279_a_at	Rlc1	1.31345	0.393361
1623811_at	mRpL18	1.31346	0.393372
1638644_at	CG12479	1.31365	0.393578
1626701_at	CG4743	1.31454	0.394562
1627746_at	eater	1.31472	0.394752
1629964_at	Nufip	1.31591	0.39606
1628019_a_at	spas	1.31641	0.396605
1640107_at	obst-A	1.31744	0.397734
1623197_a_at	zormin	1.31775	0.398076
1631993_s_at	Ald	1.31841	0.398794
1640500_at	CG13678	1.31902	0.399465
1634321_s_at	CG2051	1.32017	0.400724
1629346_at	CG1443	1.32085	0.401469
1627979_at	Wnt6	1.32104	0.401677
1639544_at	CG8010	1.32188	0.402594
1632955_at	PhKgamma	1.32256	0.403328
1638539_at	CG7137	1.32308	0.403896
1628755_at	Gfr	1.32408	0.404989
1637430_s_at	CG1572	1.32423	0.405149
1632895_at	CG31146	1.32456	0.405518
1629497_at	TTLL3A	1.32472	0.405689
1635840_s_at	msl-2	1.32477	0.405744
1628715_a_at	Karl	1.32501	0.406003
1624554_at	CG3703	1.32563	0.406682
1637286_a_at	raw	1.32699	0.408158
1638309_at	CG16733	1.32719	0.40837
1633048_at	proPo-A3	1.32738	0.408577
1629670_at	CG17376	1.32752	0.408735
1634966_a_at	Aly	1.32792	0.409167
1639085_at	Wwox	1.32813	0.409395
1627456_s_at	mub	1.32873	0.410043
1637768_at	CG30100 /// CG42372	1.32931	0.410674
1625047_at	qkr58E-2	1.32992	0.411339
1635655_at	cv-2	1.32997	0.411395
1629264_at	CG13025	1.33068	0.412162
1634009_at	cp309	1.33144	0.412984
1632852_s_at	Gs1	1.33178	0.413356
1628875_at	pain	1.33262	0.414266
1639509_at	Nnp-1	1.33385	0.415601
1626533_a_at	CG11727 /// DsimCG11727	1.33396	0.415713
1634526_a_at	qua	1.3349	0.41673
1632273_at	CG5789	1.33496	0.416792
1626228_a_at	CG6967	1.33658	0.418551
1628867_s_at	CG42390	1.3371	0.419112
1630256_at	lectin-24Db	1.33756	0.419604
1631214_at	CG1675	1.33756	0.419608
1632383_at	Art1	1.33775	0.419807
1639025_at	Trc8	1.33781	0.419876
1629091_at	CG5177	1.33806	0.420142
1639993_at	CG3149	1.33816	0.420251
1631772_a_at	MTA1-like	1.33818	0.420271
1637201_s_at	tinc	1.3391	0.421268
1635473_at	Apf	1.3393	0.421478
1633193_at	CheA29a	1.33949	0.421683
1637503_at	ear	1.34017	0.42242
1625925_at	His2A:CG31618 /// His2A:CG33808 /// His2A:CG33814 /// His2A:CG33817 /// His2A:CG33820 /// His2A:CG33823 /// His2A:CG33826 /// His2A:CG33829 /// His2A:CG33832 /// His2A:CG33835 /// His2A:CG33838 /// His2A:CG33841 /// His2A:CG33844 /// His2A:CG33847 /// His2A:CG33850 /// His2A:CG33853 /// His2A:CG33856 /// His2A:CG33859 /// His2A:CG33862 /// His2A:CG33865	1.34021	0.422462
1634582_at	CG32736 /// CG42308	1.34097	0.423273
1634868_at	CG13016	1.34136	0.423698
1623697_s_at	CG33465	1.34154	0.423885
1633830_at	CG10195	1.34172	0.42408
1632776_at	CSN5	1.34173	0.424092
1640975_at	Lcp65Ag2	1.34178	0.424152
1634594_at	CG17738	1.34213	0.424523
1625432_at	ths	1.34228	0.424683
1635597_at	Snap24	1.343	0.425463
1633940_at	CG9393	1.34304	0.425506
1624070_at	RpS9	1.3431	0.425566
1640669_at	CG17163	1.34347	0.425968
1634290_a_at	mew	1.34359	0.426089
1639752_at	mthl1	1.34427	0.426822
1633293_at	CG10157	1.3447	0.427282
1631168_at	CG5687	1.34509	0.427702
1627287_at	CG5966	1.34537	0.428005
1634866_at	CG4880	1.34585	0.428517
1638784_s_at	CG34261	1.34719	0.429956
1632078_at	CG10326	1.34722	0.429982
1635695_at	Sdic3	1.34772	0.430521
1625204_a_at	CG34134 /// CG8475	1.34803	0.43085
1626390_at	Ced-12	1.34827	0.431113
1626387_s_at	mei-217 /// mei-218	1.34829	0.431128
1628512_at	CG7441 /// DmirCG7441 /// DsimGD14730	1.34832	0.431163
1623081_at	Jhebp29	1.34883	0.431708
1629813_at	CG17691	1.35008	0.433048
1627326_a_at	CG6860	1.35039	0.433375
1623125_at	CG4459	1.35051	0.433507
1625641_s_at	CG9650	1.35072	0.433732
1632868_a_at	wg	1.35125	0.434297
1635437_at	CG11920	1.35126	0.434301
1630417_at	Spn	1.3519	0.434987
1627656_at	grk	1.35225	0.435359
1635407_at	CG32772	1.35298	0.436138
1633375_at	CG5026	1.35373	0.436941
1632171_a_at	CG3436	1.35412	0.43736
1638848_at	CG6241	1.35442	0.43768
1632591_at	Phk-3	1.35509	0.438386
1624060_at	bab2	1.35562	0.438952
1640959_at	CG18369	1.3558	0.43914
1639694_s_at	Arc1 /// CG10102	1.35704	0.440458
1637240_a_at	Atg7	1.35765	0.441116
1622895_at	CG32075	1.35825	0.441754
1640075_a_at	path	1.35832	0.441825
1635163_at	CG5731	1.35889	0.442426
1631493_at	cathD	1.35931	0.442877
1627242_at	l(2)efl	1.35982	0.443411
1632440_at	CG7630	1.36152	0.445214
1639115_s_at	rtGEF	1.3641	0.447945
1637484_at	CG6985	1.36657	0.450564
1631139_a_at	fs(2)ltoPP43	1.36716	0.451187
1628732_at	pon	1.36922	0.453357
1632462_at	elm	1.3694	0.45354
1633164_s_at	CG10625	1.36947	0.453622
1624775_at	CG10628	1.37045	0.454645
1627763_at	CG31048	1.37095	0.455172
1629606_at	CG13890	1.37111	0.455342
1625185_at	CAH2	1.37119	0.455432
1635826_s_at	CG9940 /// DmirCG9940	1.37151	0.455769
1632332_at	CG5447	1.37158	0.455839
1633483_a_at	CG14207	1.37205	0.456335
1626190_a_at	CG10825	1.37232	0.456621
1641256_at	beg	1.37301	0.45734
1627911_at	CG14286	1.37357	0.457933
1640417_a_at	Pkn	1.37384	0.45821
1625885_at	betaTub97EF	1.3742	0.458587
1638735_at	prel	1.37442	0.458818
1624273_at	CG8034 /// DmirCG8034	1.37449	0.458893
1626736_at	ph-d	1.37481	0.459229
1634019_at	CG2064	1.37551	0.459967
1622992_at	twe	1.37595	0.460433
1633021_s_at	Spn	1.377	0.461525
1623594_at	blow	1.3782	0.462782
1626366_at	ppl	1.37892	0.463534
1625992_s_at	CG34413	1.37923	0.463868
1632912_s_at	CG13667	1.37944	0.464079
1630603_at	CG31352	1.37948	0.464129
1630683_at	Patr-1	1.38043	0.465122
1627778_a_at	Art3	1.38054	0.465232
1632498_at	CG15629	1.3814	0.466127
1626110_a_at	CG9053	1.38404	0.468884
1623053_a_at	CG5174	1.38436	0.469223
1630264_at	RpL22-like	1.38491	0.469794
1636835_at	CG16700	1.38514	0.470029
1626411_at	l(1)G0193	1.38519	0.470084
1627841_at	CG11170	1.38562	0.470535
1629027_at	CG14662	1.38676	0.471716
1626046_s_at	CG5585 /// CG6434	1.38781	0.47281
1633803_at	Pgm	1.38823	0.473246
1626917_at	CG31337	1.39067	0.475781
1631875_at	CG1172 /// DbuzCG1172	1.39169	0.476843
1636510_a_at	Lsd-1	1.39398	0.479207
1628596_at	CG4610	1.39398	0.479211
1634742_at	Sodh-2	1.39479	0.480045
1632338_a_at	CG33523	1.3966	0.481921
1630797_at	CG32582	1.39696	0.482286
1628018_at	Hml	1.39817	0.483543
1628482_at	Rab39	1.39836	0.483732
1635984_at	Neu3	1.39867	0.484055
1638619_s_at	CG17698	1.39917	0.484574
1625795_a_at	CG3394	1.39945	0.484856
1624861_at	AlkB	1.3997	0.485118
1628550_a_at	Pmm45A	1.40009	0.485521
1628298_at	Dox-A3	1.40065	0.4861
1632402_at	CG6744	1.40072	0.486174
1636380_at	dnt	1.40242	0.487923
1639217_s_at	brat	1.40248	0.48798
1627343_a_at	CG5535	1.40309	0.488603
1637300_at	CG8229	1.40431	0.489863
1640513_a_at	CG32150	1.40469	0.490256
1638849_a_at	CG2875	1.40501	0.490585
1632891_s_at	Hrb27C	1.40531	0.490889
1633973_at	ox	1.40658	0.492195
1629634_at	CG42593	1.40733	0.492964
1625041_at	Oatp74D	1.40743	0.493063
1635130_a_at	SamDC	1.40765	0.49329
1635479_a_at	scramb1	1.40807	0.49372
1630668_a_at	jagn	1.40848	0.494136
1623582_at	CG6364	1.40866	0.494322
1629259_at	CG4186	1.40902	0.494693
1624726_s_at	CG7145	1.41038	0.496081
1633022_at	CG1316	1.41046	0.496162
1639232_s_at	SP1029	1.41094	0.496652
1629614_at	CG31549	1.41203	0.49777
1632846_at	alpha4GT1	1.41258	0.498329
1635576_at	Nplp2	1.41353	0.499301
1637000_at	Vha68-1	1.41485	0.500645
1635652_at	CG3585 /// DrepCG3585	1.41536	0.50117
1635370_at	Tsp42El	1.41568	0.5015
1625310_at	CG5235	1.41718	0.503027
1634428_at	CG5924	1.41806	0.503916
1625146_a_at	RN-tre	1.41814	0.503996
1626223_at	CG2543	1.41889	0.504763
1632390_at	cer	1.41915	0.505031
1630196_at	Bem46	1.4196	0.50548
1640202_at	Idgf2	1.41964	0.505522
1623692_s_at	rho-4	1.42186	0.507778
1632956_at	CG3021	1.42273	0.508662
1631098_at	CG7194	1.4228	0.508738
1639741_at	HLHm5	1.42288	0.50881
1629468_at	CG9372	1.42302	0.508957
1628138_s_at	CG18273 /// CR18166	1.42402	0.509974
1638779_at	tef	1.42482	0.510784
1623497_at	HLHm3	1.42656	0.512536
1635189_at	Drs	1.42669	0.512668
1634859_at	r2d2	1.4277	0.513689
1635305_s_at	Trl	1.42956	0.515568
1631083_at	l(1)G0144	1.42988	0.515896
1631561_s_at	CG4607 /// DsimCG4607	1.43358	0.519622
1631865_at	CG13064	1.43406	0.520105
1634818_s_at	CG42314	1.43432	0.520368
1627228_at	CG15309	1.43464	0.520687
1634296_s_at	CG17646	1.43616	0.522213
1631382_at	CG13085	1.43618	0.522236
1623102_at	Gip	1.43623	0.522286
1628121_at	Osi14	1.43985	0.525922
1639542_at	Sema-5c	1.43992	0.525985
1626306_at	rok	1.44001	0.526078
1629662_at	CG3527	1.44022	0.52629
1639568_at	epsin-like	1.44147	0.527537
1641005_at	TwdlBeta	1.44262	0.528693
1630855_s_at	Ste12DOR /// Ste:CG33236 /// Ste:CG33237 /// Ste:CG33238 /// Ste:CG33239 /// Ste:CG33240 /// Ste:CG33241 /// Ste:CG33242 /// Ste:CG33243 /// Ste:CG33244 /// Ste:CG33245 /// Ste:CG33246 /// Ste:CG33247	1.44442	0.530489
1628224_a_at	E23	1.44528	0.531354
1629597_a_at	Asph	1.44585	0.531921
1630824_a_at	CG33145	1.44623	0.532296
1638348_at	Nnf1b	1.44712	0.53318
1637939_at	Spn43Aa	1.45085	0.536903
1624813_s_at	CG34008	1.45179	0.537835
1626379_a_at	CG17490	1.4536	0.539628
1623425_at	Buffy	1.45399	0.540017
1626520_at	Rad17	1.45401	0.540033
1623643_s_at	Idgf3	1.45532	0.541336
1629966_at	E(spl)	1.45951	0.54548
1633753_at	otk	1.46097	0.546924
1626864_at	Pmm45A	1.46189	0.547839
1624571_s_at	CG32500 /// CG32857 /// CG33502	1.4619	0.54784
1628742_at	mld	1.46282	0.54875
1629227_at	baz	1.46289	0.548823
1631834_at	CG31098	1.46786	0.553718
1634872_at	CG4975 /// CG4984	1.46927	0.555096
1626021_at	CG32055	1.47025	0.556062
1623552_s_at	CG2893	1.47275	0.558512
1625606_at	Ocho	1.47301	0.558765
1627744_at	CG15209	1.47345	0.559193
1631380_s_at	LanB1	1.47372	0.559458
1627218_a_at	CG7646	1.47582	0.561516
1638886_at	CG8319	1.47689	0.56256
1631455_at	CG30493 /// l(2)08492	1.4782	0.563841
1624324_a_at	mRpS5	1.47888	0.564506
1626058_at	lbl	1.48054	0.566124
1639180_at	Arc1	1.48238	0.567918
1623864_at	CG6321	1.48349	0.568993
1624181_at	out	1.484	0.569493
1629222_at	Ahcy13	1.48403	0.569517
1635347_a_at	CG8557 /// DmirCG8557	1.48476	0.570227
1629029_at	CG5160	1.48956	0.574891
1636316_a_at	CG42593	1.49	0.575314
1635294_at	CG9312	1.49041	0.575713
1636647_s_at	CG40160	1.49158	0.576846
1629894_at	Cht11	1.49185	0.577107
1636392_at	CG15785	1.49338	0.578579
1627423_at	CG6178	1.49606	0.58117
1633641_a_at	CG15611	1.49757	0.582623
1636727_at	CG4768	1.50031	0.585256
1637423_at	CG6674	1.50132	0.586233
1632666_at	LanB2	1.50161	0.586506
1626934_a_at	wb	1.50221	0.587083
1640913_at	gfzf	1.50291	0.587761
1634768_at	CG12009	1.50459	0.589369
1632835_at	CG9376	1.50477	0.589543
1633524_a_at	CalpA	1.5124	0.596844
1636847_s_at	Mkrn1	1.51389	0.598262
1631804_s_at	PQBP-1	1.51432	0.598673
1639183_a_at	mira	1.5149	0.599219
1633701_at	CG16985	1.51514	0.599453
1635689_at	Lcp2	1.51651	0.600759
1639873_at	CG6745	1.51702	0.601242
1633758_at	Tsp86D	1.52007	0.604138
1634011_at	HLHmdelta	1.52023	0.604294
1631021_at	CG4771	1.52051	0.604552
1626955_at	CG12014	1.52086	0.604886
1635428_at	CG12863	1.52244	0.606386
1637249_at	CG10721	1.52363	0.607512
1630503_at	CG6045	1.52517	0.60897
1637413_at	CG13424	1.52802	0.611661
1641066_s_at	fbp	1.53053	0.614034
1639048_a_at	CG8229	1.53121	0.614674
1640103_s_at	CG17224	1.53231	0.615707
1635494_at	Bc	1.53342	0.616756
1634656_s_at	CG33155 /// mRpL53	1.53357	0.616893
1635210_a_at	Ppn	1.53412	0.617411
1636483_at	CG6511	1.53548	0.618689
1623887_at	Pimet	1.53675	0.619882
1623572_at	xmas-2	1.53704	0.620157
1627582_a_at	CG30035 /// DmirCG30035	1.54119	0.624044
1635764_at	CG14696 /// DvarCG14696	1.54275	0.625506
1628261_at	CG13067	1.54401	0.626683
1630866_at	RhoGAP18B	1.54512	0.627716
1640494_at	CG13272	1.54672	0.629212
1633520_at	CG32027	1.54756	0.629995
1634733_at	CG3831 /// DmirCG3831	1.5499	0.632171
1626152_at	Ror	1.55174	0.63389
1638567_at	CG1092	1.55246	0.634554
1631194_at	CG10265	1.55252	0.634608
1626388_at	Ctr1B	1.55788	0.639583
1636248_at	CG15628	1.55816	0.639847
1639825_at	comt	1.56023	0.641762
1624328_a_at	44440	1.56053	0.642033
1635430_a_at	CG6791	1.56171	0.643128
1640189_at	trol	1.56198	0.643372
1624905_at	ste24a	1.56212	0.643506
1629549_s_at	rl	1.5651	0.646256
1632543_at	CG9003	1.5665	0.647543
1640299_at	Edg91	1.56802	0.64894
1641738_a_at	CG13636	1.56988	0.650657
1639333_at	al	1.57118	0.651845
1633334_at	CG15822	1.57284	0.653374
1632873_at	MtnA	1.574	0.654436
1630130_at	CG4404	1.57748	0.657624
1631119_at	Cip4	1.57786	0.657968
1639890_at	CG17508	1.57855	0.658598
1636265_s_at	Btk29A	1.57868	0.658718
1626109_a_at	Drip	1.57924	0.659234
1626667_at	miple	1.58113	0.660955
1623358_at	CG30381	1.58233	0.662047
1635870_at	CG1628	1.58242	0.662133
1632644_s_at	cpo	1.58388	0.663465
1635678_at	CG11299	1.58481	0.664306
1634685_at	RpL3	1.5908	0.669749
1636947_at	bbg	1.59239	0.671191
1632975_at	CG4398	1.5939	0.67256
1634980_s_at	CG18490	1.59464	0.673231
1641244_at	l(2)not	1.5953	0.673825
1631432_at	CG15786	1.59577	0.674251
1637085_at	Cdk5	1.6	0.678072
1623364_at	CG4250	1.60263	0.680443
1640222_s_at	CG13124	1.60733	0.684662
1638327_a_at	CG17754	1.6085	0.685715
1640170_at	CG10311	1.60878	0.685963
1625141_at	CG14715	1.611	0.687957
1632089_at	CG4045	1.61233	0.689149
1625768_s_at	lola	1.61382	0.690477
1636872_at	Aats-phe	1.61438	0.690977
1627267_at	MESR3	1.61547	0.691954
1640703_at	CG30460	1.62183	0.697625
1629691_at	CG5028	1.62291	0.69858
1630977_at	CG16771	1.62625	0.701552
1638789_at	fau	1.62811	0.703195
1639223_a_at	sr	1.63298	0.707509
1624937_at	CG12288	1.63481	0.70912
1634456_at	CG34371	1.63696	0.711017
1631571_a_at	spir	1.63776	0.711724
1641068_a_at	spz	1.63938	0.713153
1622949_at	peb	1.63949	0.713247
1632063_s_at	CG11357	1.64134	0.714875
1630653_a_at	Gs2	1.6416	0.715106
1627073_a_at	CG10126	1.64174	0.715221
1637078_a_at	Poxm	1.64413	0.717324
1641375_at	CG6813	1.64525	0.718309
1630786_at	Chd3	1.64766	0.720416
1630161_at	fau	1.64798	0.720697
1625344_at	fu12	1.64833	0.721007
1625616_at	CG14566	1.6486	0.721239
1634351_at	CG7860	1.65018	0.722621
1629368_at	slou	1.65037	0.722789
1624003_at	CG10639	1.65257	0.724714
1638845_at	CG18643	1.65519	0.726994
1637869_at	rdo	1.65827	0.729679
1627053_at	slp2	1.66128	0.732295
1631302_at	CG16885	1.66638	0.736717
1633355_at	CG10802	1.66768	0.737846
1632533_at	Timp	1.67434	0.743589
1635161_at	CG7532	1.67924	0.747808
1616608_a_at	Gpdh	1.68199	0.750172
1636131_at	lig3	1.68365	0.751595
1635950_at	Su(P)	1.68807	0.755378
1625493_at	HLHm7	1.69218	0.758886
1626623_at	CG11670	1.69522	0.761476
1625564_at	Coq2	1.69741	0.763338
1634658_a_at	nemy	1.6989	0.764598
1633861_at	CG8145	1.70331	0.768341
1623555_at	CG10131	1.7035	0.768503
1636998_at	sca	1.70632	0.770885
1625745_at	CG31643	1.70657	0.771096
1631323_a_at	CG2663	1.71009	0.77407
1630198_at	Aly	1.71222	0.775866
1637304_at	CG14911	1.71403	0.777394
1633735_a_at	CG1407	1.71826	0.780944
1625710_at	CG31717	1.71844	0.7811
1630020_at	CG13041	1.7234	0.785257
1636702_at	CG15343 /// DsimCG15343	1.72869	0.78968
1629205_at	CG32032	1.72926	0.790155
1640085_at	CG9733	1.72972	0.790538
1635475_at	corn	1.73041	0.791113
1624518_at	CG13369	1.73044	0.791135
1637826_at	CG10623	1.73602	0.795787
1623411_at	lola	1.74091	0.799845
1638956_at	Fas2	1.74269	0.801312
1624547_s_at	B52	1.74319	0.801729
1639498_a_at	ap	1.74513	0.803337
1638682_a_at	neur	1.75158	0.808653
1636564_at	CG14757	1.75306	0.809876
1623299_at	Mmp2	1.75625	0.812498
1632073_at	CG8334	1.76796	0.822088
1625031_at	CG7841	1.77055	0.824201
1625130_at	CG8170	1.77256	0.825835
1634863_at	CG33107 /// Dph5	1.78082	0.83254
1636804_at	CG14629 /// DsimCG14629	1.78544	0.836282
1630380_at	CG3837	1.7856	0.836407
1640243_at	CG9267	1.78577	0.836544
1630290_at	mld	1.79122	0.840946
1624503_at	Rcd2	1.79547	0.844363
1630621_at	CG15212	1.79602	0.844804
1634096_at	Aldh	1.79645	0.845152
1639051_at	Lsm10	1.80116	0.848927
1625058_at	yellow-d	1.80912	0.855286
1630430_a_at	CG42345	1.81664	0.861271
1639722_s_at	CG4239	1.81882	0.863
1636672_at	Brd	1.82172	0.865304
1640868_at	ato	1.82409	0.867175
1625152_s_at	CG17612	1.82829	0.870494
1628339_a_at	CG7920	1.83194	0.873375
1623966_s_at	Nrt	1.83975	0.879507
1640654_at	He	1.84003	0.879731
1628580_a_at	Cdep	1.84033	0.879961
1627808_at	sing	1.84281	0.881909
1633627_at	CG13023	1.8433	0.882292
1637539_a_at	hbs	1.84344	0.882403
1634983_s_at	CG32521	1.84621	0.884566
1625273_at	sc	1.84638	0.884697
1632596_at	mRpL44	1.85042	0.88785
1632160_s_at	CG15279	1.85212	0.889176
1641164_s_at	CG11163	1.85262	0.889565
1623254_s_at	CG31531	1.85397	0.89062
1631013_at	mbc	1.8606	0.895769
1631390_at	CG5919	1.87376	0.905936
1627683_at	CG34296	1.87463	0.906605
1626888_at	CG9426	1.87916	0.910091
1633059_at	CG6357	1.87937	0.910251
1625246_at	Her	1.88214	0.912371
1641504_s_at	wdp	1.88526	0.914761
1625476_a_at	CG1674	1.89239	0.920207
1628245_at	sens-2	1.89814	0.924585
1630375_at	Mec2	1.90559	0.930235
1638804_a_at	Stlk	1.90857	0.932495
1630157_a_at	CG7453	1.91283	0.935709
1640163_at	Fas2	1.9195	0.940732
1624152_at	CG11851	1.93171	0.94988
1640335_at	CG31304	1.93244	0.950421
1633728_at	CG12728	1.95062	0.963936
1631303_s_at	NK7.1	1.95213	0.965049
1635125_a_at	CG6206 /// DsimCG6206	1.95782	0.969249
1624857_at	CG17510	1.96779	0.976575
1623875_at	CG3434 /// DwilCG3434	1.97163	0.979387
1635124_at	ase	1.97571	0.982372
1639503_at	betaTub60D	1.97962	0.985222
1633778_at	gb	1.97962	0.985224
1624374_at	CG12481	1.98638	0.990139
1640957_at	Hexo2	2.00998	1.00718
1633353_s_at	CAP	2.01113	1.00801
1636456_at	CG13053	2.02365	1.01696
1637687_at	ct	2.03038	1.02175
1637251_a_at	Sucb	2.03788	1.02707
1632524_at	Wnt4	2.0433	1.0309
1638512_at	Sb	2.05505	1.03917
1641609_at	lola	2.05884	1.04183
1640423_at	pxb	2.06543	1.04644
1638811_at	Sug	2.06916	1.04905
1640129_at	slp1	2.0748	1.05297
1628990_at	Hmgcr	2.07763	1.05494
1626214_s_at	CG40354 /// Eb1	2.08294	1.05862
1633459_a_at	fau	2.08325	1.05884
1636762_a_at	scf	2.0928	1.06544
1633088_at	CG4733 /// DlitCG4733	2.09452	1.06662
1638405_at	CG9338 /// DsimCG9338	2.10159	1.07148
1624774_a_at	Fas2	2.11749	1.08235
1625431_at	repo	2.13558	1.09463
1638652_at	CG40006	2.15408	1.10707
1625889_at	RpL3	2.16195	1.11233
1637581_at	lola	2.1653	1.11457
1639838_at	CG8483	2.18003	1.12435
1624398_at	CG8630	2.18318	1.12643
1639406_at	lbm	2.19351	1.13324
1637758_at	CG7737	2.19684	1.13543
1625198_at	ss	2.1981	1.13626
1635936_at	CG13822	2.20371	1.13994
1635483_at	CG16884 /// DsimCG16884	2.2064	1.14169
1641327_at	CG9416	2.21114	1.14479
1636272_at	tey	2.21868	1.1497
1624054_at	Adgf-A	2.22812	1.15582
1626341_at	Smyd4	2.22819	1.15587
1625691_at	Tre1	2.23166	1.15811
1638417_at	CG31373	2.23497	1.16026
1633674_at	CG31150	2.24888	1.16921
1631183_at	RhoL	2.26424	1.17903
1639951_at	CG2611	2.26472	1.17933
1633383_at	toe	2.27006	1.18273
1633673_a_at	ATPsyn-beta	2.3053	1.20495
1639592_at	CG3624	2.31458	1.21075
1628385_a_at	Mef2	2.31574	1.21147
1641476_a_at	Timp	2.32485	1.21713
1640097_at	Pxn	2.33145	1.22123
1639181_at	CG14598	2.34801	1.23144
1628993_at	beat-IIb	2.369	1.24428
1632529_at	tinc	2.37923	1.2505
1628766_at	CG4975 /// CG4984	2.38336	1.253
1630938_a_at	CG14879	2.39881	1.26232
1634671_a_at	CG41284	2.40509	1.26609
1638892_at	CG5397	2.41335	1.27104
1631327_at	mspo	2.41416	1.27152
1623037_a_at	CG5594	2.41654	1.27294
1629442_at	egr	2.43267	1.28254
1623503_at	sda	2.43793	1.28566
1632430_at	Tsf1	2.45314	1.29463
1623980_at	CG15905	2.46207	1.29987
1641042_at	CG16820	2.46306	1.30045
1639178_s_at	mael	2.46659	1.30252
1637269_at	CG6310	2.48129	1.31109
1624404_a_at	Sk1	2.50991	1.32764
1639109_a_at	CRMP	2.52579	1.33674
1638959_at	CG8501	2.53825	1.34384
1624262_at	phyl	2.54588	1.34816
1638400_at	CG8503	2.54969	1.35032
1631627_at	CG5335 /// Fbp1	2.55632	1.35407
1637228_at	CG10663	2.57411	1.36407
1636493_at	dei	2.58938	1.3726
1637150_at	CG13928	2.60083	1.37897
1637275_a_at	CG13335	2.62081	1.39001
1632082_at	Ndg	2.63325	1.39684
1637962_at	spir	2.63758	1.39922
1625503_at	CG32425	2.65168	1.40691
1633480_at	Reck	2.67747	1.42087
1632431_s_at	Ance	2.68848	1.42679
1626048_at	HLHmgamma	2.6978	1.43178
1633292_a_at	CG4300	2.70076	1.43337
1625588_s_at	CG6199	2.70702	1.4367
1634481_at	RhoGAP18B	2.7432	1.45586
1632550_at	unc-5	2.76833	1.46902
1634574_a_at	Strn-Mlck	2.78703	1.47873
1638345_at	fog	2.82169	1.49656
1629180_at	O-fut2	2.82577	1.49864
1630223_at	skl	2.83524	1.50347
1634161_at	zuc	2.87596	1.52404
1625366_at	rst	2.94153	1.55657
1636331_at	Sox102F	3.01607	1.59267
1627734_at	nau	3.0254	1.59713
1623910_at	alphaTub85E	3.05582	1.61156
1638596_at	ac	3.05926	1.61318
1639110_at	CG4484	3.12819	1.64533
1629771_at	Cyp12a5	3.18323	1.67049
1630026_s_at	dpp	3.18458	1.6711
1640221_at	CG10479	3.22856	1.69089
1635630_a_at	spir	3.25837	1.70415
1632070_at	Ugt58Fa	3.27664	1.71222
1630400_at	pxb	3.27816	1.71289
1636887_s_at	CG11247	3.28814	1.71727
1622923_at	wrapper	3.29434	1.71999
1630515_s_at	Glt	3.3084	1.72613
1635088_at	CG1444	3.35608	1.74678
1625980_at	CG11835	3.35698	1.74717
1625780_a_at	CG9812	3.47962	1.79893
1633000_a_at	CadN	3.52387	1.81716
1636742_at	DmirCG13575 /// nord	3.53179	1.8204
1633245_at	CG15529	3.55104	1.82824
1632742_at	eyg	3.59218	1.84486
1629889_s_at	regucalcin	3.60084	1.84833
1628450_at	Nplp1	3.6331	1.8612
1630233_at	CG5399	3.69223	1.88449
1628334_at	m4	3.77868	1.91788
1638888_at	unpg	3.84459	1.94283
1632675_s_at	CG5455	3.91551	1.9692
1625385_at	ct	4.04265	2.0153
1637625_s_at	CG32813	4.09678	2.03449
1639485_at	CG3893	4.1057	2.03763
1636149_at	CG31705	4.20115	2.07079
1625950_a_at	CG7777	4.20126	2.07082
1636161_at	CG3371	4.27046	2.09439
1641413_s_at	CG3074	4.38438	2.13237
1635756_at	CG32039	4.42142	2.14451
1625894_at	CG11370	4.52054	2.1765
1641442_a_at	trol	4.57482	2.19372
1629747_at	Cpr49Ag	4.6534	2.21829
1627512_at	CG31915	4.75004	2.24794
1637835_at	CG12177	4.79168	2.26053
1637619_s_at	Dscam	5.07906	2.34456
1637691_at	CG4570	5.3339	2.41519
1625195_s_at	shn	5.35543	2.421
1636347_at	Hs6st	5.3598	2.42218
1639671_at	egr	5.35985	2.42219
1634044_at	bib	5.37697	2.42679
1638365_at	CG3244	5.58876	2.48253
1626233_at	CG8965	6.02166	2.59016
1632530_s_at	CG8776	6.05588	2.59834
1623006_at	SerT	6.44429	2.68802
1641304_s_at	CG9801	6.45063	2.68944
1641390_at	dpr19	6.77436	2.76009
1625972_at	CG31999	6.88218	2.78287
1638198_at	CG12768	7.15502	2.83895
1625349_at	beat-IIIc	7.31417	2.87069
1629430_s_at	regucalcin	7.50606	2.90806
1633345_at	Scr	7.67287	2.93977
1640296_a_at	Optix	7.73274	2.95098
1627704_a_at	dTraf1/Traf4	7.9767	2.99579
1638964_at	CG7800	8.28459	3.05043
1633927_a_at	beat-IIIc	8.71592	3.12365
1639913_at	Con	9.55792	3.2567
1636780_at	meso18E	9.71108	3.27963
1629903_at	CG30359	12.6396	3.65988
1625687_at	kon	12.8742	3.68641
1639106_at	Grip	13.803	3.78691
1623977_at	nvy	14.9832	3.90528
1623208_at	Sox100B	15.8925	3.99028
1625116_at	trol	15.973	3.99756
1639550_a_at	CG9650	17.5302	4.13177
1640223_a_at	trol	17.8856	4.16072
1623734_at	m6	19.7037	4.3004
1623144_at	ci	19.8978	4.31454
1634250_at	Act57B	20.1041	4.32942
1636348_s_at	Act87E	22.3731	4.48369
1639426_at	CG9593	23.2936	4.54186
1626439_at	CG15353	28.6521	4.84057
1639229_at	vkg	29.5438	4.88478
1630150_s_at	Cg25C	31.6311	4.98327
1631682_at	twi	35.0793	5.13255
1624989_s_at	Ef1alpha100E	37.2637	5.2197
1628262_a_at	zfh1	39.7971	5.31459
1625825_at	BM-40-SPARC	41.827	5.38636
1640867_s_at	htl	48.1366	5.58906
1632548_a_at	Mes2	48.9821	5.61418
1628247_at	Him	49.78	5.63749
1634063_a_at	stumps	68.6848	6.10192

## Sheet: Gene list in Figure 1C,D
Probe ID	Gene Symbol	Fold Change (B/A) >1.5	Fold Change (A/P)>1.2	log2 Fold Change (B/A)	log2 Fold Change (A/P)
1636456_at	CG13053	11.8783	2.02365	3.57026	1.01696
1628121_at	Osi14	5.17276	1.43985	2.37094	0.525922
1636742_at	DmirCG13575 /// nord	5.15041	3.53179	2.36469	1.8204
1630621_at	CG15212	4.52769	1.79602	2.17877	0.844804
1630026_s_at	dpp	4.43981	3.18458	2.1505	1.6711
1639838_at	CG8483	3.77327	2.18003	1.91582	1.12435
1637602_at	Edem1	3.38588	1.23486	1.75953	0.304353
1626058_at	lbl	3.20993	1.48054	1.68254	0.566124
1632533_at	Timp	2.92072	1.67434	1.54633	0.743589
1624623_at	CG32972	2.81679	1.25584	1.49405	0.328647
1633059_at	CG6357	2.80764	1.87937	1.48936	0.910251
1633345_at	Scr	2.76838	7.67287	1.46904	2.93977
1635028_s_at	CG11714 /// Fuca	2.76552	1.25288	1.46755	0.325251
1631804_s_at	PQBP-1	2.724	1.51432	1.44573	0.598673
1628301_at	CG32159	2.71416	1.21999	1.44051	0.286873
1639749_a_at	ptc	2.54316	1.20268	1.34662	0.266253
1633334_at	CG15822	2.44262	1.57284	1.28843	0.653374
1639830_s_at	CG8850	2.44039	1.30618	1.28711	0.385354
1638512_at	Sb	2.32663	2.05505	1.21824	1.03917
1623102_at	Gip	2.28109	1.43623	1.18972	0.522286
1633888_s_at	kirre	2.2271	1.20723	1.15516	0.271705
1632430_at	Tsf1	2.13982	2.45314	1.09749	1.29463
1641476_a_at	Timp	2.10527	2.32485	1.074	1.21713
1633021_s_at	Spn	2.07398	1.377	1.0524	0.461525
1635125_a_at	CG6206 /// DsimCG6206	2.05526	1.95782	1.03932	0.969249
1632529_at	tinc	2.01774	2.37923	1.01274	1.2505
1632524_at	Wnt4	1.99906	2.0433	0.999321	1.0309
1631303_s_at	NK7.1	1.9788	1.95213	0.984627	0.965049
1628334_at	m4	1.96676	3.77868	0.975819	1.91788
1632644_s_at	cpo	1.94907	1.58388	0.962788	0.663465
1640513_a_at	CG32150	1.9454	1.40469	0.960064	0.490256
1622949_at	peb	1.93766	1.63949	0.954317	0.713247
1624608_s_at	cpo	1.93036	1.25024	0.948867	0.322209
1629368_at	slou	1.92826	1.65037	0.947303	0.722789
1632868_a_at	wg	1.86295	1.35125	0.897591	0.434297
1627073_a_at	CG10126	1.82531	1.64174	0.868141	0.715221
1637838_at	CG34380	1.81519	1.2582	0.860121	0.331359
1636248_at	CG15628	1.77596	1.55816	0.828596	0.639847
1624262_at	phyl	1.74634	2.54588	0.804335	1.34816
1625862_x_at	CG40178 /// CG41320	1.74562	1.26905	0.803738	0.343748
1636998_at	sca	1.72546	1.70632	0.786983	0.770885
1623932_at	Ent3	1.72099	1.29589	0.783243	0.373948
1637869_at	rdo	1.71506	1.65827	0.778263	0.729679
1627979_at	Wnt6	1.69044	1.32104	0.757399	0.401677
1629696_a_at	CG30497	1.68654	1.23036	0.75407	0.299077
1624374_at	CG12481	1.65885	1.98638	0.730186	0.990139
1625432_at	ths	1.61762	1.34228	0.693875	0.424683
1637752_a_at	CG9363	1.61718	1.21331	0.693477	0.27895
1626021_at	CG32055	1.61335	1.47025	0.690059	0.556062
1625972_at	CG31999	1.60403	6.88218	0.681701	2.78287
1641068_a_at	spz	1.59663	1.63938	0.675027	0.713153
1625385_at	ct	1.59213	4.04265	0.670954	2.0153
1632294_at	sens	1.58862	1.26398	0.667775	0.337971
1632975_at	CG4398	1.57459	1.5939	0.654974	0.67256
1635124_at	ase	1.57353	1.97571	0.654003	0.982372
1636149_at	CG31705	1.57229	4.20115	0.652865	2.07079
1632895_at	CG31146	1.56723	1.32456	0.648215	0.405518
1631993_s_at	Ald	1.55772	1.31841	0.639433	0.398794
1623980_at	CG15905	1.55535	2.46207	0.637242	1.29987
1635655_at	cv-2	1.534	1.32997	0.617298	0.411395
1637955_a_at	CG1827	1.51246	1.23003	0.596901	0.298698
